1 Landscape-level DNA metabarcoding study in the Pannonian forests reveals differential effects of  
2 slope aspect on taxonomic and functional groups of fungi

3

4 József Geml

5 Naturalis Biodiversity Center, Vondellaan 55, P.O. Box 9517, 2300 RA Leiden, The Netherlands

6 Faculty of Science, Leiden University, P.O. Box 9502, 2300 RA Leiden, The Netherlands

7 Phone: +31 71 75117265, Fax: + 31 71 5273522; E-mail: [jozsef.geml@naturalis.nl](mailto:jozsef.geml@naturalis.nl)

8

9

## 10 **Abstract**

11 In temperate regions, slope aspect is one of the most influential drivers of environmental conditions  
12 at landscape level. The effect of aspect on vegetation has been well studied, but virtually nothing is  
13 known about how fungal communities are shaped by aspect-driven environmental conditions. I  
14 carried out DNA metabarcoding of fungi from soil samples taken in a selected study area of  
15 Pannonian forests to compare richness and community composition of taxonomic and functional  
16 groups of fungi between slopes of predominantly southerly vs. northerly aspect and to assess the  
17 influence of selected environmental variables on fungal community composition. The deep sequence  
18 data presented here (i.e. 980 766 quality-filtered sequences) indicate that both niche (environmental  
19 filtering) and neutral (stochastic) processes shape fungal community composition at landscape level.  
20 Fungal community composition correlated strongly with aspect, with many fungi showing preference  
21 for either south-facing or north-facing slopes. Several taxonomic and functional groups showed  
22 significant differences in richness between north- and south-facing slopes and strong compositional  
23 differences were observed in all functional groups. The effect of aspect on fungal communities likely  
24 is mediated through contrasting mesoclimatic conditions, that in turn influence edaphic processes as  
25 well as vegetation. Finally, the data presented here provide an unprecedented insight into the  
26 diversity and landscape-level community dynamics of fungi in the Pannonian forests.

27

28 **Key words:** beta diversity; fungal community ecology; ITS2 rDNA; topography

29

30 INTRODUCTION

31 In temperate regions, slope aspect is among the most influential factors that drive the  
32 physical environment at the landscape level. The aspect effect is driven primarily by the variation in  
33 the amount of solar radiation per surface area, which is a function of the angle of incidence of solar  
34 radiation. As a result, slopes oriented toward the Equator receive higher intensity and greater  
35 duration of solar radiation, which can be 50% higher on south-facing than on north-facing slopes in  
36 the northern hemisphere (Geiger 1965; Rosenberg *et al.* 1983; Gilliam *et al.* 2014). These contrasting  
37 energy inputs can profoundly alter mesoclimatic conditions, particularly air and upper soil  
38 temperature, which, in turn, affect relative humidity, evapotranspiration, soil moisture and edaphic  
39 processes (Fekedulegn *et al.* 2003). As a result, slopes with poleward (in this case, northerly) aspect  
40 generally are cool and more humid, while slopes with southerly aspect tend to be markedly warmer  
41 and drier, particularly in mid- and high latitudes (Holland & Steyn 1975; Méndez-Toribio *et al.*  
42 2016).

43 Such aspect-related contrasts in the abiotic environment are intuitively expected to have  
44 influence on the composition of biotic communities. Indeed, the effects of aspect on vegetation are  
45 well known and clear compositional differences have been found between north- and south-facing  
46 slopes in various ecosystems, e.g., in temperate and Mediterranean forests (Whittaker 1956;  
47 Sternberg & Shoshany 2001; Gilliam *et al.* 2014), temperate grasslands (Schmidt 2013), boreal  
48 forests (Hollingsworth *et al.* 2006), and arctic tundra (Walker *et al.* 1994). On the other hand,  
49 virtually nothing is known about the influence of aspect on richness and community composition of  
50 fungi at landscape level, except two recent studies focusing on arbuscular mycorrhizal fungal  
51 richness in boreal forests and arid steppes in China (Chu *et al.* 2016; Liu *et al.* 2017). Therefore, how  
52 slope aspect affects richness and community composition of various taxonomic and functional  
53 groups of fungi remains unknown.

54 According to the macroecological study of Tedersoo *et al.* (2014), global-scale fungal  
55 diversity and distribution patterns are primarily influenced by climatic factors, mainly mean annual  
56 temperature and precipitation, followed by edaphic factors, particularly pH, and spatial patterns due  
57 to dispersal limitation. On the other hand, the coupling between vegetation and soil fungal  
58 community composition and richness appears to be much weaker, with the exception of  
59 ectomycorrhizal (ECM) fungi (Tedersoo *et al.* 2014; Peay *et al.* 2016). Therefore, it is reasonable to  
60 hypothesize that the above-mentioned aspect-driven environmental differences are expected to  
61 influence the diversity and distribution of fungal communities at landscape level as well.

62 In this study, I tested the effects of aspect on the richness and composition of taxonomic and  
63 functional groups of fungi at a selected study site in the Pannonian forests, where regional climatic

64 conditions and geological parent material were uniform in order to minimize confounding factors.  
65 The Pannonian biogeographical region represents unique ecosystems in Europe (Sundseth 2009). It  
66 covers the inner parts of the Carpathian basin and is characterized by a great wealth of floristic and  
67 faunistic elements from different parts of Eurasia. More specifically, in addition to the broadly  
68 distributed Eurasian species, there are numerous sub-Mediterranean, continental, Pontic and  
69 Balkanian species. The distinctiveness of the Pannonian biogeographic region comes from the  
70 combination of these elements, as well as the occurrence of Pannonian endemics (Fekete *et al.* 2016).  
71 The geologically diverse mountain range of the Északi-középhegység (North Hungarian Mountains)  
72 represents the northern part of the Pannonian biogeographic region. The region is characterized by  
73 high habitat diversity, partly due to the complex geology which features a wide variety of calcareous,  
74 volcanic and igneous rocks (Pelikán 2010), and partly due to the diverse topography that creates a  
75 broad spectrum of mesoclimatic conditions. This diversity of habitats allows for the coexistence of  
76 sub-Mediterranean, continental, Atlantic, and Carpathian floristic and faunistic elements often in  
77 close proximity, depending on slope, aspect, elevation, and geological parent material (Suba 1983;  
78 Vojtkó 2002; Vojtkó *et al.* 2010). With respect to macrofungi, there is a long history of sporocarp-  
79 based studies in various areas of the Északi-középhegység (Bohus & Babos 1960; Takács & Siller  
80 1980; Rimóczi 1992, 1994; Tóth 1999; Siller *et al.* 2002; Albert & Dima 2005; Egri 2007; Pál-Fám  
81 *et al.* 2007; Rudolf *et al.* 2008; Siller 2010; Siller & Dima 2014). In addition, morphological and  
82 molecular analyses of roots colonized by ECM genera *Humaria*, *Gevea*, *Tomentella*, and *Tuber* have  
83 been carried out in a well-preserved montane beech forest reserve (Kovács & Jakucs 2006; Erős-  
84 Honti *et al.* 2008; Jakucs *et al.* 2015). However, the diversity and distribution of fungi, particularly  
85 microscopic fungi, in various habitats types are still unexplored and I am not aware of any molecular  
86 study assessing the local (alpha) diversity and/or community turnover (beta diversity) of fungal  
87 communities in the Pannonian forests.

88 The objectives of this DNA metabarcoding study were 1) to provide the first insights into the  
89 kingdom-wide taxonomic and functional diversity of fungi in different Pannonian forest types on a  
90 landscape scale; 2) to compare richness and community composition of fungi among sampling sites  
91 among predominantly south- and north-facing slopes; and 3) to assess the influence of selected  
92 environmental variables on fungal community composition.

93

## 94 MATERIALS AND METHODS

### 95 *Study area*

96 Within the broader region of the Északi-középhegység characterized above, the focal area of  
97 this study is located in the valley of the Tarna creek situated between the Mátra and the Bükk, the

98 two highest mountains in Hungary. The study area is characterized by rolling hills of low elevations  
99 (200-500 m a.s.l.) that are mostly covered with managed secondary forests. The regional climate is  
100 subcontinental, with warm summers (mean July temperature ca. 20°C), cold winters (mean January  
101 temperature ca. -3°C), and mean annual temperature and precipitation of ca. 9.5°C and ca. 580 mm,  
102 respectively (Tóth 1983; Horváth & Gaálová 2007).

103 Pannonian-Balkan turkey oak-sessile oak forests (*Quercetum petraeae-cerris*, Natura 2000  
104 code 91M0) form the zonal vegetation type on gentle slopes and in placor settings in the study area  
105 as well as in other colline (200-450 m a.s.l.) areas of the Északi-középhegység. They are dominated  
106 by oaks, such as *Quercus dalechampii*, *Q. petraea*, and *Q. cerris*, and can attain 15-25 m canopy  
107 height. Within the turkey oak-sessile oak zone, Pannonian thermophilous downy oak forests (*Corno-*  
108 *Quercetum pubescentis*, 91H0) generally develop on shallow and rocky soil on steep (> 20°), south-  
109 facing slopes. These xerothermic forests are also dominated by the same oak species as the zonal  
110 forest type, but the canopy remains low or medium tall (8-10 m), with the characteristic appearance  
111 of *Q. pubescens*, particularly in the western half of Hungary, where this vegetation type is more  
112 widespread. In the Északi-középhegység, thermophilous oak forests tend to occur in isolated patches  
113 with particularly warm and dry mesoclimate (Vojtkó 2002; Borhidi 2003; Vojtkó *et al.* 2010; Bölöni  
114 *et al.* 2011).

115 North-facing, gentle slopes are mostly covered by Pannonian sessile oak-hornbeam forests  
116 (*Carici pilosae-Carpinetum*, 91G0), that are predominantly mesophilous, submontane (400-600 m  
117 a.s.l.) forests, characteristic of cool, relatively humid habitats on deep soils, with a canopy height of  
118 25-30 m. These mixed forests are dominated by *Carpinus betulus* and *Quercus petraea*, with *Acer*  
119 *campestre*, *A. platanoides*, *Cerasus avium*, and *Tilia cordata* occurring sporadically. In the low-  
120 elevation landscape of the study area, extrazonal submontane beech forests (*Melittio-Fagetum*) occur  
121 very sporadically and are restricted to steep, north-facing slopes with the coldest mesoclimatic  
122 conditions. These are tall (25-35 m), mesic forests, where *Fagus sylvatica* generally is  
123 monodominant. In zonal settings in the Északi-középhegység, beech forests (9130) are represented  
124 by submontane beech forest (*Melittio-Fagetum*) between 400 and 750 m a.s.l. and montane beech  
125 forest (*Aconito-Fagetum*) above 750 m a.s.l., the latter featuring many species with Carpathian  
126 distributions (Borhidi 2003; Vojtkó *et al.* 2010; Bölöni *et al.* 2011).

127 The fourteen sampling sites were evenly distributed in two hills (Kis-várhegy and Nagy-  
128 várhegy) just south of the village of Sirok, Heves county, Hungary (Fig. 1, Table 1). The location  
129 was chosen because it features, in an unusually small area (< 2 km<sup>2</sup>), the above-mentioned major  
130 Pannonian forest types of northern Hungary, which are distributed according to aspect-based

131 differences in mesoclimatic conditions in a not spatially clustered manner. Furthermore, potentially  
132 confounding factors that often limit the interpretation of ecological studies in natural habitats are  
133 minimal: 1) the Kis-várhegy and Nagy-várhegy are uniformly composed of Jurassic calcareous  
134 limestone (Pelikán 2010); 2) the regional climate is uniform throughout the small study area; 3) all  
135 forest types are represented by old-growth (> 80y) secondary forests; 4) the elevation differences  
136 among the sampling sites are minor (< 60 m) and are not related to aspect or to any other  
137 environmental conditions; and 5) the spatial proximity and the continuous natural or semi-natural  
138 landscape are expected to facilitate unrestricted dispersal of fungal propagules among the sites by  
139 wind, water or by wildlife. Therefore, I hypothesized that any observed compositional differences  
140 among the samples would be the result of niche-based and stochastic processes, with the former  
141 primarily referring to environmental filtering according to differences in abiotic and biotic factors  
142 driven by topography: predominantly northerly vs. southerly aspect and to a lesser extent by slope  
143 angle.

144

#### 145 *Sampling and molecular work*

146 For this study, fourteen sites were chosen that represented forests of northerly and southerly  
147 aspects on both the Kis- and Nagy-várhegy. At each site (ca. 10 × 25 m), 20 samples (5 cm<sup>3</sup> each) of  
148 top soil from underneath the litter layer were taken at each sampling site in such a way that samples  
149 were at least 2 m from each other to minimize the probability of sampling the same genet repeatedly.  
150 Soil samples collected at a given site were pooled, resulting in a composite soil sample for each site.  
151 Ca. 20 g of each composite sample was kept frozen until DNA extraction, while the rest was used for  
152 soil chemical analyses to measure pH (water-based), and total carbon (C) and nitrogen (N) contents  
153 following Sparks *et al.* (1996).

154 Genomic DNA was extracted from 0.5 ml of soil from each composite sample using  
155 NucleoSpin<sup>®</sup> soil kit (Macherey-Nagel GmbH & Co., Düren, Germany), according to manufacturer's  
156 protocol. The ITS2 region (ca. 250 bp) of the nuclear ribosomal DNA repeat was PCR amplified  
157 using primers fITS7 (Ihrmark *et al.*, 2012) and ITS4 (White *et al.*, 1990). The ITS4 primer was  
158 labelled with sample-specific Multiplex Identification DNA-tags (MIDs). The amplicon library was  
159 sequenced at Naturalis Biodiversity Center (Naturalis) using an Ion 318<sup>TM</sup> Chip and an Ion Torrent  
160 Personal Genome Machine (Life Technologies, Guilford, CT, U.S.A.). Detailed protocols of the  
161 molecular work are described in Geml *et al.* (2014b).

162

#### 163 *Bioinformatic work*

164 The initial clean-up of the raw data was carried out using Galaxy  
165 (<https://main.g2.bx.psu.edu/root>), in which the sequences were sorted according to samples and  
166 adapters (identification tags) were removed. The primers were removed and poor-quality ends were  
167 trimmed off based on 0.02 error probability limit in Geneious Pro 8 (BioMatters, New Zealand).  
168 Subsequently, sequences were filtered using USEARCH v.8.0 (Edgar, 2010) based on the following  
169 settings: all sequences were truncated to 200 bp and sequences with expected error > 1 were  
170 discarded. For each sample, sequences were collapsed into unique sequence types, while preserving  
171 their counts. The quality-filtered sequences from all samples were grouped into operational  
172 taxonomic units (OTUs) at 97% sequence similarity and putative chimeric sequences were removed  
173 using USEARCH. I assigned sequences to taxonomic groups based on pairwise similarity searches  
174 against the curated UNITE+INSD fungal ITS sequence database (version released on October 10,  
175 2017), containing identified fungal sequences with assignments to Species Hypothesis (SH) groups  
176 delimited based on dynamic sequence similarity thresholds (Kõljalg *et al.* 2013). After excluding  
177 OTUs with < 80% similarity or < 150 bp pairwise alignment length to a fungal sequence, 6216  
178 fungal OTUs were retained, representing a total of 980 766 quality-filtered sequences, including  
179 1930 global singletons. Global singletons are routinely excluded from metabarcoding studies,  
180 because the vast majority of them represent erroneous sequences (Lindahl *et al.* 2013; Geml *et al.*  
181 2016, 2017). However, this practice likely results in the exclusion of some real high-quality data on  
182 locally rare species. Because, to my best knowledge, this is the first metabarcoding study in the  
183 Pannonian forests, I intended to keep all high-quality data, including 343 singletons with > 98%  
184 sequence similarity to a reference fungal SH, a conservative threshold for conspecificity in most  
185 fungal groups (Kõljalg *et al.* 2013), and excluded the remaining 1587 singletons from further  
186 analyses. DNA sequences have been deposited in NCBI (accession numbers provided upon  
187 manuscript acceptance).

188 Only OTUs with > 90% similarity to a fungal SH with known ecological function were  
189 assigned to one of the following functional groups: animal pathogens, ECM fungi, lichens, litter  
190 decomposers, mycoparasites, plant pathogens, root-associated fungi (non-ECM orchid and ericoid  
191 mycorrhizal fungi and root endophytes), saprotrophs (generalists), and wood decomposers.  
192 Arbuscular mycorrhizal fungi were not included in the analyses, because only one representative  
193 OTU was found in the quality-filtered dataset. The initial functional assignments were made by  
194 FunGuild (Nguyen *et al.* 2015) and were manually checked afterwards. For genera that are known to  
195 comprise species from multiple functional guilds (e.g., *Amanita*, *Entoloma*, *Ramaria*, and many SH  
196 groups in the Sebaciniales), I assigned ecological function for each OTU individually, based on  
197 available ecological information for the matching SH in the UNITE database.

198

199 *Statistical analyses*

200 I normalized the OTU table for subsequent statistical analyses by rarefying the number of  
201 high-quality fungal sequences to the smallest library size (36 946 reads). The resulting matrix  
202 contained 4312 fungal OTUs. Linear regression analyses in R (R Development Core Team 2013)  
203 were used to examine relationships between aspect and richness of taxonomic and functional groups  
204 of fungi as well as between aspect and environmental variables, i.e. edaphic factors (pH, C, N, and  
205 C/N) and the relative abundance values of the two dominant tree genera (*Carpinus* and *Quercus*) that  
206 were distributed throughout the majority of sites. When aspect is treated as a continuous variable  
207 from 0° to 360°, the two extreme values of this interval refer to the same aspect in the landscape  
208 (north). Therefore, aspect was expressed as northerly aspect in degrees (south: 0°, north: 180°)  
209 following Calef *et al.* (2005), which better reflects the well-known ecological differences between  
210 north- and south-facing slopes.

211 I used the *vegan* R package (Oksanen *et al.* 2015) to run non-metric multidimensional scaling  
212 (NMDS) on the Hellinger-transformed OTU table and a secondary matrix containing environmental  
213 variables, which were standardized using the *scale* function in R. Ordinations were run separately for  
214 functional groups as well as for all fungi with the following specifications: distance measure = Bray-  
215 Curtis, dimensions = 2, initial configurations = 100, model = global, maximum number of iterations  
216 = 200, convergence ratio for stress = 0.999999. I used the *envfit* R function to fit the above-  
217 mentioned environmental variables and richness of various taxonomic and functional groups onto the  
218 NMDS ordinations and plotted isolines of northerly aspect on the NMDS ordinations using the  
219 *ordisurf* function. In addition, I tested whether fungal communities were statistically different among  
220 forest types using the multiresponse permutation procedure (MRPP) and determined any preferences  
221 of individual OTUs for forest types and for north- or south-facing slopes using indicator species  
222 analyses (Duf rene & Legendre 1997) in PC-ORD v. 6.0 (McCune & Grace 2002).

223 A series of mantel tests were carried out in PC-ORD to reveal any spatial autocorrelation in  
224 environmental variables as well as fungal community composition among the sampling sites and to  
225 measure correlation between fungal community composition and environmental variables.  
226 Furthermore, a series of partial mantel tests were applied to differentiate the effects of northerly  
227 aspect, tree genera, and edaphic factors on fungal community structure. Finally, I estimated what  
228 proportions of the total variation in fungal community composition were explained by topography,  
229 tree genera, and edaphic factors using variation partitioning (Borcard *et al.* 1992; Legendre *et al.*  
230 2005) with a series of redundancy analyses (RDAs) in Canoco 5 (Microcomputer Power, Ithaca, NY,

231 USA). The expectation in purely neutral (stochastically assembled) communities is no correlation  
232 between the environmental distance and the community dissimilarity of two sites (Smith &  
233 Lundholm 2010).

234

## 235 RESULTS

### 236 *Correlation of elevation with fungal richness and environmental variables*

237 In total, the quality-filtered and rarefied dataset contained 4312 fungal OTUs in the 14 soil  
238 samples taken from the representative types of Pannonian forests. Of these, 2196 OTUs had > 90%  
239 similarity to a fungal SH with known ecological function were assigned to functional groups.  
240 Richness values of most functional groups showed significant ( $p < 0.05$ ) or marginally ( $p < 0.1$ )  
241 significant correlation with northerly aspect. For example, I found positive correlation in root-  
242 associated fungi ( $r^2 = 0.231$ ;  $p = 0.047$ ), mycoparasites ( $r^2 = 0.148$ ;  $p = 0.096$ ), and wood  
243 decomposers ( $r^2 = 0.204$ ;  $p = 0.059$ ) with northerly aspect, while negative correlation was observed  
244 in lichens ( $r^2 = 0.154$ ;  $p = 0.091$ ), plant pathogens ( $r^2 = 0.231$ ;  $p = 0.047$ ), and generalist saprotrophs  
245 ( $r^2 = 0.615$ ;  $p < 0.001$ ) (Fig. 2). Richness of several taxonomic groups also correlated with northerly  
246 aspect with varying significance, positively in Agaricomycetes ( $r^2 = 0.261$ ;  $p = 0.036$ ),  
247 Tremellomycetes ( $r^2 = 0.211$ ;  $p = 0.056$ ), Leotiomycetes ( $r^2 = 0.166$ ;  $p = 0.083$ ), and  
248 Mortierellomycota and Mucoromycota that had formerly been classified to Zygomycota ( $r^2 = 0.465$ ;  
249  $p = 0.004$ ), and negatively in Dothideomycetes ( $r^2 = 0.605$ ;  $p < 0.001$ ), Eurotiomycetes ( $r^2 = 0.523$ ;  $p$   
250  $= 0.002$ ), and Sordariomycetes ( $r^2 = 0.386$ ;  $p = 0.011$ ) (Fig. 2). Among the measured edaphic factors,  
251 only pH correlated significantly with northerly aspect, showing strong negative correlation ( $r^2 =$   
252  $0.516$ ;  $p = 0.002$ ). With respect to vegetation, the relative abundance of *Quercus* correlated  
253 negatively ( $r^2 = 0.837$ ;  $p < 0.001$ ), while that of *Carpinus* correlated positively ( $r^2 = 0.269$ ;  $p =$   
254  $0.033$ ) with northerly aspect (Fig. 2).

255

### 256 *Comparing fungal community composition among the sampling sites*

257 All NMDS analyses resulted in 2-dimensional solutions with the following final stress values  
258 for all fungi (0.0693), animal pathogens (0.1396), ECM fungi (0.1046), litter fungi (0.1575),  
259 mycoparasites (0.0871), plant pathogens (0.0679), root-associated fungi (0.1342), saprotrophs  
260 (0.0947), and wood decomposers (0.1471). In all cases, the NMDS ordinations revealed strong  
261 structuring of fungal communities according to aspect. In addition, a weaker, but often clear  
262 separation could be observed among the four forest types. Community composition of all fungi in the  
263 sampling sites clearly structured according aspect which represented the first axis ( $r = 0.999$ ) (Fig.  
264 3). Soil pH ( $r = -0.993$ ) correlated strongly with the first axis in that south-facing slopes had higher



265 pH than north-facing ones. With respect to trees, relative abundance of oaks ( $r = -0.977$ ) correlated  
266 negatively, while both hornbeam ( $r = 0.587$ ) and beech ( $r = 0.311$ ) correlated positively with  
267 northerly aspect, although these latter two in a weaker manner. The second axis seemed to represent  
268 the differences in C, N, and particularly in C/N ratio ( $r = 0.998$ ) among the sites as well as the  
269 varying dominance of hornbeam ( $r = -0.810$ ) versus beech ( $r = 0.951$ ) on the north-facing slopes.  
270 Richness of only two functional groups showed significant correlation with the NMDS ordinations:  
271 generalist saprotrophs correlating negatively with both the first ( $r = -0.835$ ) and second axes ( $r = -$   
272  $0.551$ ), while lichens predominantly correlated with the second axis ( $r = 0.934$ ) and to a lesser extent  
273 with the first axis ( $r = -0.356$ ). As for taxonomic groups with significant results, richness values of  
274 Dothideomycetes ( $r = -0.976$ ), Eurotiomycetes ( $r = -0.848$ ), and Sordariomycetes ( $r = -0.753$ ) were  
275 negatively, while that of Mortierellomycota and Mucoromycota ( $r = 0.921$ ) was positively correlated  
276 with northerly aspect (Fig. 3).

277 NMDS plots of the datasets corresponding to the functional groups of fungi showed similar  
278 correlations with aspect, forest types, and edaphic variables as detailed above. The NMDS  
279 ordinations of four largest functional groups in terms of OTU richness, i.e. ECM fungi, plant  
280 pathogens, generalist saprotrophs, and wood decomposers, are shown in Fig. 4, while those of the  
281 three less species-rich functional groups, i.e. animal pathogens, litter decomposers, mycoparasites,  
282 and root-associated fungi are shown in Fig. S1. Richness values of taxonomic families (or genera,  
283 when a family was represented by a single genus) of ECM fungi that correlated with northerly aspect  
284 were as follows: only ascomycete genera, i.e. *Elaphomyces*, *Helvella*, and *Tuber* showed negative  
285 correlations with northerly aspect, while only basidiomycetes, i.e. *Amanita*, Atheliaceae, *Cortinarius*,  
286 *Inocybe*, *Laccaria*, Russulaceae, and *Sebacina* correlated positively with northerly aspect. In  
287 addition, *Cenococcum*, *Clavulina*, and Thelephoraceae showed positive correlation with axis 2.  
288 Vectors representing the richness of taxonomic groups of plant pathogens seemed to be relatively  
289 evenly distributed in the ordination plot. Of these, Bionectriaceae and Mycosphaerellaceae showed  
290 preference for hornbeam forests, while *Leptodontitidum*, Taphrinaceae, and Venturiaceae seemed to  
291 favor beech forests, both on north-facing slopes. Conversely, richness in Coniochaetaceae,  
292 Didymellaceae, Massarinaceae, Phaeosphaeriaceae, *Pyrenochaeta*, and Spizellomycetaceae  
293 correlated strongly with southerly aspect. With regard to generalist saprotrophs, the majority of taxa  
294 showed clear preference for south-facing slopes, such as *Acremonium*, Aspergillaceae,  
295 Chaetomiaceae, Didymosphaeriaceae, Gomphaceae, Helotiaceae, Lasiosphaeriaceae, Microascaceae,  
296 Onygenaceae, Sporormiaceae, Stachybotryaceae, *Tetracladium*, Trichocomaceae,  
297 Tricholomataceae, Trichomeriaceae, and Trichosporonaceae, while Mortierellaceae, Tremellaceae,  
298 Umbellopsidaceae, and to some extent Cunninghamellaceae tended to have higher richness in sites of

299 northerly aspect. In wood decomposers, Corticiaceae, Hyaloscyphaceae, Lophiostomataceae, and  
300 *Pluteus* correlated negatively, while Chaetosphaeriaceae, Crepidotaceae, Helotiaceae, *Trechispora*,  
301 and Xylariaceae correlated positively with northerly aspect. MRPP confirmed the importance of  
302 aspect in shaping fungal community composition (effect size  $A = 0.084$ , probability  $p < 0.001$ ).  
303 There were 137 and 174 significant ( $p < 0.05$ ) indicator fungal OTUs characteristic of north- and  
304 south-facing slopes, of which, 46 and 69 were assigned to functional groups, respectively (Table 2).

305

306 *Assessing the effects of environmental factors on fungal community composition*

307 Mantel tests showed that neither spatial proximity nor slope had any significant correlation  
308 with fungal community composition or with aspect, relative abundance of tree genera, and edaphic  
309 factors. On the other hand, aspect was strongly correlated with the relative abundance of tree genera  
310 ( $r = 0.526$ ;  $p < 0.001$ ) and weakly with edaphic factors ( $r = 0.151$ ;  $p = 0.046$ ), while there was  
311 moderate correlation between tree genera and edaphic factors ( $r = 0.266$ ;  $p < 0.035$ ) (Table 3).  
312 Fungal community composition was strongly correlated with aspect ( $r = 0.743$ ,  $p < 0.001$ ), relative  
313 abundance of tree genera ( $r = 0.558$ ,  $p < 0.001$ ), and edaphic factors ( $r = 0.535$ ,  $p < 0.001$ ).  
314 Nonetheless, partial mantel tests indicated that aspect in itself had a strongly significant effect on  
315 community structure ( $r = 0.637$ ,  $p < 0.001$ ) when tree genera was accounted for (control matrix),  
316 while the effect of tree genera was substantially weaker, though still significant ( $r = 0.295$ ,  $p =$   
317  $0.018$ ) when aspect was controlled. Conversely, the correlations of aspect ( $r = 0.793$ ,  $p < 0.001$ ) and  
318 edaphic factors ( $r = 0.639$ ,  $p < 0.001$ ) with fungal community composition were both strong when  
319 edaphic factors or aspect were controlled for, respectively (Table 3).

320 Variation partitioning analyses indicated that the tested environmental variables explained  
321 24.3% of the total variation observed. Topography (aspect and slope) explained 15.1% of the  
322 variation, but only 0.8% after accounting for the relative abundance of dominant tree genera and  
323 edaphic factors. Tree genera accounted for 14.7% of the variation and 3.1% when the effect of other  
324 variables was removed. Measured soil variables explained 17.9% of the variation, of which 5.9%  
325 was attributed to their 'pure' effect. The shared variation explained by topography and tree genera  
326 and by topography and edaphic factors was 2.5% and 2.9%, respectively, while the shared effects of  
327 all three groups of variables accounted for 8.9% of the total variation (Fig. S2).

328

#### 329 4. DISCUSSION

330 *Drivers of landscape-level compositional patterns of fungal communities*

331 The deep sequence data presented here clearly show that fungal community composition at  
332 the selected Pannonian forest sites is strongly structured according to slope aspect. Although some

333 fungal species occurred in all samples, the majority of fungal OTUs preferred either south- or north-  
334 facing slopes, as suggested by the observed community turnover as well as the numerous indicator  
335 species. Similarly, even though total fungal richness was not statistically different between north-  
336 and south-facing slopes, many functional and taxonomic groups of fungi were more diverse on  
337 slopes of northerly or southerly aspect.

338 Naturally, the effect of slope aspect on fungal community composition and richness is  
339 mediated through abiotic and biotic factors that are driven either directly or indirectly by the  
340 differences in net solar radiation received in north- and south-facing slopes. For example, aspect  
341 strongly influences local air and surface temperature, soil moisture, relative humidity, and soil  
342 chemical processes (Gilliam *et al.* 2014). Consequently, the habitats found on north- and south-  
343 facing slopes have distinct meso- and microclimatic as well as edaphic conditions. These differences  
344 are particularly marked regarding available moisture, soil organic matter, and pH, as had been  
345 observed in the study region previously (Dobos 2010), which, in turn, influence the composition of  
346 biotic communities and their interactions. Although the relative abundance of the two dominant tree  
347 genera (*Carpinus* and *Quercus*) was strongly influenced by aspect, they occurred in most of the sites.  
348 Therefore, and because the vast majority of plant-associated fungi are not strictly specific to a tree  
349 genus or family, I argue that to a great extent the observed fungal community patterns are caused by  
350 a complex array of aspect-driven environmental variables and not by the type of vegetation alone.

351 The availability of soil moisture is one of the most important environmental conditions that  
352 determines richness as well as community composition in fungi (Crowther *et al.* 2014; Tedersoo *et al.*  
353 2014). Because at landscape scale, as in the study area, annual precipitation is considered uniform  
354 across the sampling sites due to their close proximity, topography likely is the most important factor  
355 that influences moisture availability through contrasting levels of evapotranspiration between north-  
356 and south-facing slopes, as has been observed in several biomes (Fekedulegn *et al.* 2003; Méndez-  
357 Toribio *et al.* 2016). Drought-tolerant fungi are generally regarded as generalists, instead of dry  
358 specialists, with respect to their ability to grow along a broad moisture gradient (Lennon *et al.* 2012),  
359 while drought-intolerant fungi are considered specialists to a narrow range of mesic conditions,  
360 where they likely have competitive advantage over the generalists (Crowther *et al.* 2014). The  
361 resulting competitive dynamics may force drought-tolerant fungi to the more xeric south-facing  
362 slopes, while fungi with a stronger competitive ability under mesic conditions are expected to  
363 dominate the mesophilous forests on the north-facing slopes in the study area.

364 Soil pH is also known to play an important role in shaping fungal communities (Porter *et al.*  
365 1987; Coughlan *et al.* 2000; Lauber *et al.* 2008; Rousk *et al.* 2010; Geml *et al.* 2014a; Tedersoo *et al.*  
366 2014; Glassman *et al.* 2017) and is often influenced by slope aspect (Gilliam *et al.* 2014; Chu *et al.*

367 2016). Because many fungal species have a relatively wide pH optimum (e.g. Wheeler *et al.* 1991;  
368 Nevarez *et al.* 2009), it is likely that the observed correlation of pH with community composition is  
369 mainly indirect, e.g., via altering nutrient availability and competitive interactions between soil fungi  
370 and bacteria (Rousk *et al.* 2008), and other soil biota. In the study sites, there was a strong negative  
371 correlation of soil pH with northerly aspect and the interaction of topography (mainly aspect) and  
372 edaphic factors (primarily pH) provided a large fraction of the explained variation in fungal  
373 community composition. Therefore, it is difficult to disentangle the ‘pure’ effect of pH from that of  
374 aspect. Nevertheless, for some fungal groups that are known to be influenced by soil pH, the data  
375 presented here are in agreement with previous results. For example, root endophytic fungi had been  
376 shown to prefer low soil pH (Postma *et al.* 2006) and the strong preference of non-ECM root-  
377 associated fungi for the northerly sites with lower pH in this study confirms the above trend.  
378 Similarly, ECM fungi are generally considered acidophilus (Read 1991), and there was weak,  
379 although non-significant, positive correlation between ECM fungal richness and northerly aspect (i.e.  
380 sites with lower pH). The only other edaphic factors with strong correlation with fungal community  
381 structure was C/N ratio, which was not related to aspect. Instead, changes in C/N ratio appeared to be  
382 related to different forest types on the north-facing slopes, i.e. oak-hornbeam and submontane beech  
383 forests. Because C/N is considered a direct measure of resource quality (Nielsen *et al.* 2010), it is  
384 possible that the higher C/N values in the beech forests are driven by differences in litter quality  
385 between beech and hornbeam and oak. Measurements from more beech and oak-hornbeam stands are  
386 needed to test this hypothesis.

387

### 388 *The contrasting effects of aspect on functional groups of fungi*

389 The data clearly show a strong emerging pattern driven by slope aspect in all fungal groups.  
390 Several functional groups showed strong differences in richness between north- and south-facing  
391 slopes. Mycoparasites, non-ECM root-associated fungi, and wood decomposers had higher richness  
392 in the sites with predominantly northerly aspect. The cooler microclimate in particular may be more  
393 advantageous for root-associated fungi, because this group has been shown to be more diverse at  
394 higher elevations in altitudinal gradient studies (Geml *et al.* 2014b). On the other hand, although  
395 richness of wood decay fungi and mycoparasites have been shown to decline with decreasing  
396 temperature in elevation gradients (Geml *et al.* 2014b), considering the given moisture limitation in  
397 this study area, their higher richness in north-facing slopes may be more strongly driven by the  
398 greater availability of moisture. Lichens, plant pathogens and generalist saprotrophs were clearly  
399 more species rich in the south-facing slopes. With regard to lichens, this may be a consequence of  
400 the more open canopy of the thermophilous oak forests that allow more light to penetrate and

401 apparently fosters the growth of the generally shade-intolerant and drought-tolerant lichens. On the  
402 other hand, plant pathogens and generalist saprotrophs may benefit more from the higher  
403 temperatures characteristic of the south-facing slopes, as richness values of these groups generally  
404 correlate positively with temperature in altitudinal as well as in global studies (Geml *et al.* 2014b,  
405 Tedersoo *et al.* 2014). Also, many generalist saprotrophs (e.g., in Eurotiomycetes) are known for  
406 their drought-tolerance and, based on the above-mentioned theory on competitive dynamics, they  
407 may be outcompeted in the mesic sites by mesophilic specialists, resulting in their higher diversity in  
408 the warmer and drier south-facing slopes.

409 Even in functional groups with no significant differences in richness, I observed strong  
410 compositional differences between slopes of northerly and southerly aspects. For example, in ECM  
411 fungi, ascomycete and basidiomycete genera were clearly more diverse in the south- and north-  
412 facing slopes, respectively. This is in agreement with other studies showing that ECM communities  
413 often are dominated by ascomycetes in arid and semiarid environments, while basidiomycetes tend to  
414 dominate more moist habitats (Cavender-Bares *et al.* 2009; Gehring *et al.* 2014). This may be linked  
415 to their foraging and fruiting strategies and the related differences in C requirement from the host  
416 trees. For example, trees in more xeric conditions are expected to preferentially associate with ECM  
417 fungi that have contact and short-distance, as opposed to medium- and long-distance, extrametrical  
418 mycelial exploration types and smaller fruiting bodies that are less costly in terms of C requirement.  
419

#### 420 *The unexplained component of community turnover*

421 An ever-present feature of fungal community studies is the large amount of unexplained  
422 variation in richness and community composition even at small spatial scales (Peay *et al.* 2016). In  
423 this study, the most significant compositional differences were observed between slopes of northerly  
424 and southerly aspects, but there was also substantial variation among sites within sites on the same  
425 slope. The environmental variables measured in this study explained about one quarter of the  
426 variation in fungal community composition in all sites, which confirms the above-mentioned  
427 substantial unexplained component of community assembly. Because many OTUs were rare, i.e.  
428 found only in one or two sites, most such differences may be due to random processes in community  
429 assembly as well as due to random sampling, as truly exhaustive soil sampling is practically  
430 impossible to achieve in the field. The former is partly explained by the priority effect, i.e. within a  
431 given species pool of a particular habitat, stochastic dispersal determines the order in which newly  
432 available resources are colonized by different species, which, in turn, drives to a large extent the  
433 composition of the community (Peay *et al.* 2016). In addition, other factors not examined here, such  
434 as density-dependent processes (e.g., intra- and interspecific competitions and pathogen-host

435 interactions) as well potentially important environmental variables not yet measured, may also  
436 contribute to the observed beta diversity. For example, I did not measure soil and air temperature,  
437 relative humidity, and soil moisture at the sites, partly because it is already well-known that these  
438 factors correlate strongly with aspect on mesoclimate scale, as mentioned above, and partly because  
439 obtaining a realistic characterization of these variables would have required measurements taken  
440 throughout the growing season at the sampling sites, which was beyond the scope and logistic  
441 possibilities of this case study. However, by including site-specific microclimate data as well as a  
442 more extensive list of edaphic variables, future studies may obtain more insights into the variation of  
443 environmental factors at small spatial scales as well as their influence on fungal community  
444 composition and turnover.

445

#### 446 *Contribution to the knowledge on Pannonian forest fungi*

447 This study shows a remarkably high fungal diversity in a small area (< 2 km<sup>2</sup>) of secondary  
448 forests in the eastern edge of the Mátra mountains. After the stringent quality filtering steps, the non-  
449 rarefied and rarefied datasets contained 4695 and 4312 fungal OTUs, respectively. Based on the  
450 rarefied data, well over 1000 OTUs occurred in any given sample (Fig. 2), each representing an area  
451 of ca. 250 m<sup>2</sup>. In total, I detected representatives of 707 fungal genera, of which 467 belonged to  
452 Ascomycota, 225 to Basidiomycota, 6 to Chytridiomycota, and 7 represented early-diverging  
453 lineages formerly classified in Zygomycota. Nonetheless, the true generic diversity likely is even  
454 higher, because the vast majority of fungi in the sampled sites, as well as globally, are microfungi  
455 and many of them could only be assigned to families, orders or classes due to the lack of sufficiently  
456 identified reference data. Consequently, these represent species with unknown identity, several of  
457 which may still be undescribed. With respect to the identified microfungi, the results presented here  
458 may be the first data on their diversity and possible habitat preference in the Pannonian  
459 biogeographic region, serving as potential reference data for future studies as well. By providing the  
460 full list of taxa corresponding to the 2542 unique SHs that matched the OTUs in these samples with  
461 high (> 95%) sequence similarity (Table S1), I intend to facilitate other mycological and fungal  
462 ecological studies in the region.

463 I was able to assign a relatively high proportion (51%) of fungal OTUs to functional groups,  
464 particularly in taxa with macroscopic fruiting bodies for which extensive reference data are available  
465 from Europe, e.g., agarics, boletes, coral fungi, polypores, and several true and false truffles. For  
466 example, the number of unique matching SHs in some of the most diverse basidiomycete genera  
467 were 69 in *Inocybe*, 48 in *Russula*, 18 in *Lepiota*, while somewhat surprisingly *Cortinarius* and  
468 *Lactarius* were only represented by 23 and 13 unique SHs, respectively. On the other hand, the data

469 also showed a high diversity ECM basidiomycetes with inconspicuous fruiting bodies, such *Sebacina*  
470 (66 SHs) and *Tomentella* (83 SHs) that are notoriously underrepresented in sporocarp surveys  
471 (Gardes & Bruns 1996; Kõljalg *et al.* 2000; Geml *et al.* 2012). Furthermore, I detected numerous  
472 hypogeous ECM fungi, such as *Elaphomyces muricatus* and *E. papillatus*, *Genea verrucosa*,  
473 *Hydnotrya* sp., *Hymenogaster australis*, *H. griseus*, *Hysterangium stoloniferum*, *Gautieria*  
474 *graveolens*, *Melanogaster ambiguus*, *M. broomeanus*, and *M. variegatus*, *Wakefieldia macrospora*,  
475 as well as several species of the charismatic *Tuber* genus (e.g., *T. aestivum*, *T. borchii*, *T. brumale*, *T.*  
476 *maculatum*, *T. puberulum*, *T. rapaeodorum*, *T. rufum* and possibly *T. fulgens*). Most of these are  
477 known to occur in Hungary, except for *Gautieria graveolens*, as this genus is only represented by an  
478 unidentified species in the list of hypogeous fungi for the Carpathian-Pannonian region compiled by  
479 Bratek *et al.* (2013). Representatives of these hypogeous fungi were found in all forest types,  
480 indicating that they probably are relatively common in Pannonian forests.

481 In addition, I want to emphasize the suitability of DNA metabarcoding to complement  
482 sporocarp-based assessments for biological monitoring and conservation of fungi. Specifically,  
483 studies such as this can provide valuable knowledge not only on the total diversity of fungi at any  
484 given site, but also on the distribution and habitat preferences of numerous species, including rare  
485 and/or protected species. For example, I found at least one of the thirty-five species of fungi  
486 protected by law in Hungary (Siller *et al.* 2005, 2006): *Strobilomyces strobilaceus*, which was  
487 detected on north-facing slopes of both the Kis- and Nagy-Várhegy, which confirms the habitat  
488 preference of this species for mesophilic beech and oak-hornbeam forests in Hungary (Siller *et al.*  
489 2005). Furthermore, even though the retained global singletons that were > 98% similar to a  
490 reference fungal SH had only minor contribution to richness values and had practically no influence  
491 on the community structure patterns, 238 were identified to a genus or species. Of these, the  
492 following taxa were only represented by singletons in the dataset: *Aleurodiscus aurantiacus*,  
493 *Annulohyphoxylon multiforme*, *Aspergillus cibarius*, *Baeospora myosura*, *Barbatosphaeria dryina*,  
494 *Bullera alba*, *Calonectria quinqueseptata*, *Caloplaca obscurella*, *Chaetosphaeria decastyla*,  
495 *Chroogomphus mediterraneus*, *Clavariadelphus* sp., *Coprinopsis picacea*, *Coprinus comatus*,  
496 *Cortinarius casimiri*, *Cortinarius cotoneus*, *Cortinarius infractus*, *Cortinarius pardinus*, *Crepidotus*  
497 *mollis*, *Cryptodiscus pallidus*, *Cylindrocladiella elegans*, *Dactylellina ellipsospora*, *Darksidea*  
498 *epsilon*, *Durella connivens*, *Elaphomyces papillatus*, *Elmerina caryae*, *Exidia truncata*, *Filobasidium*  
499 *magnum*, *Geastrum fornicatum*, *Geopora* sp., *Gloeocystidiellum kenyense*, *Gromoniopsis idaeicola*,  
500 *Haptocillium campanulatum*, *Hyalorbilia erythrostigma*, *Hypogymnia physodes*, *Jattaea tumidula*,  
501 *Kretzschmaria deusta*, *Lactarius necator*, *Leiosepium tulasneanum*, *Leptosphaeria rubefaciens*,  
502 *Leptospora rubella*, *Leucoagaricus barssii*, *Lophiotrema eburnoides*, *Melanelixia subaurifera*,

503 *Melanospora damnosa*, *Microstroma phylloplanum*, *Mycena renati*, *Mycosphaerella ulmi*,  
504 *Neocatelunostroma abietis*, *Neocladophialophora quercina*, *Ossicaulis lignatilis*, *Otidea onotica*,  
505 *Paxillus obscurisporus*, *Peltaster fruticola*, *Peniophorella praetermissa*, *Pestalotiposis chinensis*,  
506 *Phlebia tremellosa*, *Pholiotina teneroides*, *Phyllozoma linderiae*, *Pilidium concavum*, *Pleurophoma*  
507 *ossicola*, *Pluteus velutinus*, *Psilocybe inquilina*, *Resupinatus applicatus*, *Ramphoria pyriformis*,  
508 *Rhytisma acerinum*, *Russula albonigra*, *Russula inamoena*, *Russula sororia*, *Sarcosphaera*  
509 *coronaria*, *Scheffersomyces stipitis*, *Sistotrema brinkmannii*, *Slopeiomyces cylindrosporus*,  
510 *Sphaerollopsis macroconidialis*, *Steccherinum ochraceum*, *Stylonectria norvegica*, *Thielavia*  
511 *subthermophila*, *Tomentella badia*, *Trechispora laevis*, *Tremella yokohamensis*, *Tricholoma batschi*,  
512 *Urocystis agropyri*, *Ustilago nunavutica*, *Valsivia insitiva*, *Vanrija humicola*, *Verrucaria dolosa*,  
513 *Xenasmatella borealis*, *Xylodon rimossimus*, *Xylomelasma* sp., *Zalerion arboricola*, and *Zasmidium*  
514 *dalbergiae*. Most of the macrofungi among these, such as *Baeospora myosura*, *Coprinopsis picacea*,  
515 *Coprinus comatus*, *Cortinarius infractus*, *Crepidotus mollis*, *Geastrum fornicatum*, *Mycena renati*,  
516 *Russula albonigra*, *Russula heterophylla*, *Russula sororia*, and *Tricholoma batschi*, have been found  
517 in sporocarp surveys in the Északi-középhegység (Bohus & Babos 1960; Tóth 1999; Siller *et al.*  
518 2002; Egri 2007; Rudolf *et al.* 2008; Siller & Dima 2014). With respect to the rest, more sampling is  
519 needed to confirm their presence in the region.

520 Finally, soil communities are extremely diverse and there is increasing evidence pointing to  
521 soil biodiversity as having key roles in determining the structure and ecological responses of  
522 terrestrial ecosystems (Bardgett & van der Putten 2014). Soil fungi in particular are known to drive  
523 plant diversity and productivity and are crucial for ecosystem functioning and resilience towards  
524 disturbance (van der Heijden *et al.* 2008). Because most fungi have high habitat specificity and tend  
525 to respond quickly to changes in environmental conditions (Nielsen *et al.* 2010; Geml *et al.* 2015,  
526 2016; Morgado *et al.* 2015, 2016; Mundra *et al.* 2016; Semenova *et al.* 2015, 2016), fungi have a  
527 promising potential as indicators of habitat quality in biological monitoring programs. More  
528 specifically, assessments of richness and community composition of fungal communities in a variety  
529 of habitats can inform decision-makers with respect to land use strategies that foster the sustainable  
530 preservation of diverse and resilient ecosystems with a wide range of ecosystem functions.

531

## 532 *Conclusions*

533 A prominent finding of this study is that fungal diversity and community structure are  
534 strongly influenced by slope aspect, despite the short distance separating north- and south-facing  
535 slopes. Even though this finding may appear trivial due to the well-known effects of aspect on  
536 vegetation, fungal communities are surprisingly little studied in this regard and the data presented



537 here offer unprecedented insights into the landscape-level distribution of various taxonomic and  
538 functional groups with respect to topography. Furthermore, while aspect-driven differences in  
539 vegetation tend to be related to relative importance as opposed the presence/absence of plant species  
540 on slopes with different aspect (Gilliam et al. 2014), many fungal species were detected exclusively  
541 on either north- or south-facing slopes. This reflects the often-observed high habitat specificity  
542 exhibited by many fungi, which offers possibilities for biological monitoring and habitat  
543 characterization and I strongly advocate for incorporating fungi in biodiversity assessments and  
544 conservation efforts.

545

#### 546 ACKNOWLEDGEMENTS

547 I am grateful to Péter Molnár for his assistance during the fieldwork, to Marcel Eurlings  
548 (Naturalis) for carrying out the Ion Torrent sequencing, to Luis Morgado (University of Oslo and  
549 Naturalis) for sharing the R script for the NMDS analysis, to Eszter Draskovits and Nikolett Tarjányi  
550 (Institute for Soil Sciences and Agricultural Chemistry, Hungarian Academy of Sciences, Budapest)  
551 for their assistance in obtaining the soil chemical data, to József Sulyok and András Schmotzer  
552 (Bükk National Park) for sending maps and aerial photographs of the sampling region, and to Attila  
553 Baranyi for preparing the map for Fig. 1. I also thank Jeremy Miller (Naturalis) for his constructive  
554 comments on the manuscript. The molecular work and the soil chemical analyses were supported by  
555 the Naturalis Research Initiative fund provided to József Geml.

556

#### 557 REFERENCES

- 558 Albert L, Dima B. 2005 Ritka nagygombafajok (Basidiomycetes) előfordulása Magyarországon I.  
559 *Mikológiai Közlemények Clusiana* **44**: 3–22.
- 560
- 561 Bardgett RC, van der Putten WH. 2014. Belowground biodiversity and ecosystem functioning.  
562 *Nature* **515**: 505–511.
- 563
- 564 Bohus G, Babos M. 1960. Notes on the occurrence in Hungary of *Russula* species, with regard to  
565 their range in Europe. *Annales Historico-Naturales Musei Nationalis Hungarici* **52**: 123–146.
- 566
- 567 Borcard D, Legendre P, Drapeau P. 1992. Partialling out the spatial component of ecological  
568 variation. *Ecology* **73**: 1045–1055.
- 569
- 570 Borhidi A. 2003. *Magyarország növénytársulásai*. Akadémiai Kiadó, Budapest.

571

572 Bölöni J, Botta-Dukát Z, Illyés E, Molnár Zs. 2011. Hungarian landscape types: classification of  
573 landscapes based on the relative cover of (semi-)natural habitats. *Applied Vegetation Science* **14**:  
574 537–546.

575

576 Bratek Z, Merényi Zs, Varga T. 2013. Changes of hypogeous funga in the Carpathian-Pannonian  
577 region in the past centuries. *Acta Mycologica* **48**: 33–39.

578

579 Calef MP, McGuire D, Epstein H, Rupp ST, Shugart HH. 2005. Analysis of vegetation distribution  
580 in Interior Alaska and sensitivity to climate change using a logistic regression approach. *Journal of*  
581 *Biogeography* **32**: 863–878.

582

583 Cavender-Bares J, Izzo A, Robinson R, Lovelock CE. 2009. Changes in ectomycorrhizal community  
584 structure on two containerized oak hosts across an experimental hydrologic gradient. *Mycorrhiza* **19**:  
585 133–142.

586

587 Chu H, Xiang X, Yang J, Adams JM, Zhang K, Li Y, Shi Y. 2016. Effects of slope aspects on soil  
588 bacterial and arbuscular fungal communities in a boreal forest in China. *Pedosphere* **26**: 226–234.

589

590 Coughlan AP, Dalpé Y, Lapoint L, Piché Y. 2000. Soil pH-induced changes in root colonization,  
591 diversity, and reproduction of symbiotic arbuscular mycorrhizal fungi from healthy and declining  
592 maple forests. *Canadian Journal of Forest Research* **30**: 1543–1554.

593

594 Crowther TW, Maynard DS, Crowther TR, Peccia J, Smith JR, Bradford MA. 2014. Untangling the  
595 fungal niche: a trait-based approach. *Frontiers in Microbiology* doi:10.3389/fmicb.2014.00579

596

597 Dobos E. 2010. A Mátravidék talajai. In: Baráz Cs. (Ed.) *A Mátrai Tájvédelmi Körzet – Heves és*  
598 *Nógrád határán*. Bükk Nemzeti Park Igazgatóság, pp. 141–147.

599

600 Dufrière M, Legendre P. 1997. Species assemblages and indicator species: the need for a flexible  
601 asymmetrical approach. *Ecological Monographs* **67**: 345–366.

602

603 Edgar, R.C. 2010 Search and clustering orders of magnitude faster than BLAST. *Bioinformatics* **26**:  
604 2460–2461

605

606 Egri K. 2007. Újabb adatok a Zempléni-hegység és a Bodrogköz veszélyeztetett nagygombáiról.  
607 *Mikológiai Közlemények Clusiana* **46**: 149–164.

608

609 Erős-Honti Zs, Kovács GM, Szedlay Gy, Jakucs E. 2008. Morphological and molecular  
610 characterization of *Humaria* and *Genea* ectomycorrhizae from Hungarian deciduous forests.  
611 *Mycorrhiza* **18**: 133–143.

612

613 Fekedulegn D, Hicks RR, Colbert JJ. 2003. Influence of topographic aspect, precipitation and  
614 drought on radial growth of four major tree species in an Appalachian watershed. *Forest Ecology*  
615 *and Management* **177**: 409–425.

616

617 Fekete G, Király G, Molnár Z. 2016. Delineation of the Pannonian vegetation region. *Community*  
618 *Ecology* **17**: 114–124.

619

620 Gardes M, Bruns T. 1996. Community structure of ectomycorrhizal fungi in a *Pinus muricata* forest:  
621 above- and below-ground views. *Canadian Journal of Botany* **74**: 1572–1583.

622

623 Gehring CA, Mueller RC, Haskins KE, Rubow TK, Whitham TG. 2014. Convergence in  
624 mycorrhizal fungal communities due to drought, plant competition, parasitism, and susceptibility to  
625 herbivory: consequences for fungi and host plants. *Frontiers in Microbiology*  
626 doi:10.3389/fmicb.2014.00306

627

628 Geiger R. 1965. *The climate near the ground*. Harvard University Press, Cambridge, MA.

629

630 Geml J, Gravendeel B, Neilen M, Lammers Y, Raes N, Semenova TA, Noordeloos ME. 2014a.  
631 DNA metabarcoding reveals high fungal diversity and pH-correlated habitat partitioning in protected  
632 coastal *Salix repens* communities in the Netherlands. *PLOS ONE* 9(6): e99852.

633

634 Geml J, Morgado LN, Semenova-Nelsen TA, Schilthuizen M. 2017. Changes in richness and  
635 community composition of ectomycorrhizal fungi among altitudinal vegetation types on Mount  
636 Kinabalu in Borneo. *New Phytologist* **215**: 454–468.

637

- 638 Geml J, Morgado LN, Semenova TA, Welker JM, Walker MD, Smets E. 2015. Long-term warming  
639 alters richness and composition of taxonomic and functional groups of arctic fungi. *FEMS*  
640 *Microbiology Ecology* doi: 10.1093/femsec/fiv095  
641
- 642 Geml J, Pastor N, Fernandez L, Pacheco S, Semenova TA, Becerra AG Wicaksono CY, Nouhra ER.  
643 2014b. Large-scale fungal diversity assessment in the Andean Yungas forests reveals strong  
644 community turnover among forest types along an altitudinal gradient. *Molecular Ecology* **23**: 2452–  
645 2472  
646
- 647 Geml J, Semenova TA, Morgado LN, Welker JM. 2016. Changes in composition and abundance of  
648 functional groups of arctic fungi in response to long-term summer warming. *Biology Letters*  
649 **12**:20160503  
650
- 651 Geml J, Timling I, Robinson CH, Lennon N, Nusbaum HC, Brochmann C, Brochmann C,  
652 Noordeloos ME, Taylor DL. 2012. An arctic community of symbiotic fungi assembled by long-  
653 distance dispersers: phylogenetic diversity of ectomycorrhizal basidiomycetes in Svalbard based on  
654 soil and sporocarp DNA. *Journal of Biogeography* **39**: 74–88.  
655
- 656 Gilliam FS, Hédli R, Chudomelová M, McCulley RL. 2014. Variation in vegetation and microbial  
657 linkages with slope aspect in a montane temperate hardwood forest. *Ecosphere* **5**: 1–17.  
658
- 659 Glassman SI, Wang IJ, Bruns TD. 2017. Environmental filtering by pH and soil nutrients drives  
660 community assembly in fungi at fine spatial scales. *Molecular Ecology* **26**: 6960–6973.  
661
- 662 Holland PG, Steyn DG. 1975. Vegetational responses to latitudinal variations in slope angle and  
663 aspect. *Journal of Biogeography* **2**: 179–183.  
664
- 665 Hollingsworth TN, Walker MD, Chapin III FS, Parsons AL. 2006. Scale-dependent environmental  
666 controls over species composition in Alaskan black spruce communities. *Canadian Journal of Forest*  
667 *Research* **36**: 1781–1796.  
668
- 669 Horváth G, Gaálová K. 2007. Éghajlati viszonyok. In: Kiss G, Baráz Cs, Gaálová K, Judik B. (Eds.)  
670 *A Karancs-Medves és Cseres-hegység Tájvédelmi Körzet – Nógrád és Gömör határán*. Bükki  
671 Nemzeti Park Igazgatóság, pp. 91–92.

672

673

674 Ihrmark K, Bödeker ITM, Cruz-Martinez K, Friberg H, Kubartova A, Schenk J, Strid Y, Stenlid J,  
675 Brandstöm-Durling M, Clemmensen KE, *et al.* 2012. New primers to amplify the fungal ITS2  
676 region -- evaluation by 454-sequencing of artificial and natural communities. *FEMS Microbiology*  
677 *Ecology* **82**: 666–677.

678

679 Jakucs E, Erős-Honti Zs, Seress D, Kovács GM 2015. Enhancing our understanding of anatomical  
680 diversity in *Tomentella* ectomycorrhizas characterization of six new morphotypes. *Mycorrhiza* **25**:  
681 419–429.

682

683 Kovács GM, Jakucs E. 2006. Morphological and molecular comparison of white truffle  
684 ectomycorrhizae. *Mycorrhiza* **16**: 567–574.

685

686 Kõljalg U, Dahlberg A, Taylor AFS, Larsson E, Hallenberg N, Stenlid J, Larsson KH, Fransson PM,  
687 Kårén O, Johnsson L. 2000. Diversity and abundance of resupinate theleporoid fungi as  
688 ectomycorrhizal symbionts in Swedish boreal forests. *Molecular Ecology* **9**: 1985–1996.

689

690 Kõljalg U, Nilsson RH, Abarenkov K, Tedersoo L, Taylor AFS, Bahram M, Bates ST, Bruns TD,  
691 Bengtsson-Palme J, Callaghan TM, *et al.* 2013. Towards a unified paradigm for sequence-based  
692 identification of Fungi. *Molecular Ecology* **22**: 5271–5277.

693

694 Lauber CL, Strickland MS, Bradford MA, Fierer N. 2008. The influence of soil properties on the  
695 structure of bacterial and fungal communities across land-use types. *Soil Biology and Biochemistry*  
696 **40**: 2407–2415.

697

698 Legendre P, Borcard D, Peres-Neto PR. 2005 Analyzing beta diversity: partitioning the spatial  
699 variation of community composition data. *Ecological Monographs* **75**: 435–450.

700

701 Lennon JT, Aanderud ZT, Lehmkuhl BK, Schoolmaster DR. 2012. Mapping the niche space of soil  
702 microorganisms using taxonomy and traits. *Ecology* **93**: 1867–1879.

703

- 704 Lindahl BD, Nilsson RH, Tedersoo L, Abarenkov K, Carlsen T, Kjøller, Kõljalg U, Pennanen T,  
705 Rosendahl S, Stenlid J *et al.* 2013. Fungal community analysis by high-throughput sequencing of  
706 amplified markers – a user's guide. *New Phytologist* **199**: 288–299.  
707
- 708 Liu M, Zheng R, Bai S, Bai Y, Wang J. 2017. Slope aspect influences arbuscular mycorrhizal fungus  
709 communities in arid ecosystems of the Daqingshan Mountains, Inner Mongolia, North China.  
710 *Mycorrhiza* **27**: 189–200.  
711
- 712 McCune B, Grace JB. 2002. *Analysis of ecological communities*. Glenden Beach, OR, USA: MjM  
713 Software.  
714
- 715 Méndez-Toribio M, Meave JA, Zemeño-Hernández I, Ibarra-Manríquez G. 2016. Effects of slope  
716 aspect and topographic position on environmental variables, disturbance regime and tree community  
717 attributes in a seasonal tropical dry forest. *Journal of Vegetation Science* **27**: 1094–1103.  
718
- 719 Morgado LN, Semanova TA, Welker JM, Walker MD, Smets E, Geml J. 2015. Summer temperature  
720 increase has distinct effects on the ectomycorrhizal fungal communities of moist tussock and dry  
721 tundra in Arctic Alaska. *Global Change Biology* **21**: 959–972.  
722
- 723 Morgado LN, Semanova TA, Welker JM, Walker MD, Smets E, Geml J. 2016. Long-term increase  
724 in snow depth leads to compositional changes in arctic ectomycorrhizal fungal communities. *Global*  
725 *Change Biology* **22**: 3080–3096  
726
- 727 Mundra S, Halvorsen R, Kauserud H, Bahram M, Tederoo L, Elberling B, Cooper EJ, Eidesen PB.  
728 2016. Ectomycorrhizal and saprotrophic fungi respond differently to long-term experimentally  
729 increased snow depth in the High Arctic. *Microbiology Open* **5**: 856–869.  
730
- 731 Nevarez L, Vasseur V, Le Madec L, Le Bras MA, Coroller L, Leguérinel I, Barbier G. 2009.  
732 Physiological traits of *Penicillium glabrum* strain LCP 08.5568, a filamentous fungus isolated from  
733 bottled aromatised mineral water. *International Journal of Food Microbiology* **130**: 166–171.  
734
- 735 Nguyen NH, Song Z, Bates ST, Branco S, Tedersoo L, Menke J, Schilling JS, Kennedy PG. 2015.  
736 FUNGuild: an open annotation tool for parsing fungal community datasets by ecological guild.  
737 *Fungal Ecology* **20**: 241–248.

738

739 Nielsen UN, Osler GHR, Campbell CD, Burslem DFRP, van der Wal R. 2010. The influence of  
740 vegetation type, soil properties and precipitation on the composition of soil mite and microbial  
741 communities at the landscape scale. *Journal of Biogeography* **37**: 1317–1328.

742

743 Oksanen J, Blanchet FGK, Roeland Legendre P, Minchin PR, O'Hara RB, Simpson GL, Solymos P,  
744 Stevens MHH, Wagner H. 2012. *Vegan: Community Ecology Package*. Version 2.0-5. [http://cran.r-](http://cran.r-project.org)  
745 [project.org](http://vegan.rforge.r-project.org/). <http://vegan.rforge.r-project.org/>.

746

747 Pál-Fám F, Siller I, Fodor L. 2007. Mycological monitoring in the Hungarian Biodiversity  
748 Monitoring System. *Acta Mycologica* **42**: 35–58.

749

750 Peay KG, Kennedy PG, Talbot JM. 2016. Dimensions of biodiversity in the Earth mycobiome.  
751 *Nature Reviews Microbiology* **14**: 434–447.

752

753 Pelikán P. 2010. A Mátra és közvetlen környezetének földtana. In: Baráz Cs. (Ed.) *A Mátrai*  
754 *Tájvédelmi Körzet – Heves és Nógrád határán*. Bükk Nemzeti Park Igazgatóság, pp. 17–26.

755

756 Porter WM, Robson AD, Abbott LK. 1987. Field survey of the distribution of Vesicular-arbuscular  
757 mycorrhizal fungi in relation to soil pH. *Journal of Applied Ecology* **24**: 659–662.

758

759 Postma JWM, Olsson PA, Falkengren-Grerup U. 2006. Root colonization by arbuscular mycorrhizal,  
760 fine endophytic and dark septate fungi across a pH gradient in acid beech forests. *Soil Biology and*  
761 *Biochemistry* **39**: 400–408.

762

763 R Development Core Team, 2015. *R: a Language and Environment for Statistical Computing*. R  
764 Foundation for Statistical Computing. Vienna, Austria. [http:// www.R-project.org](http://www.R-project.org)

765

766 Read DJ. 1991. Mycorrhizas in ecosystems. *Experientia* **47**: 376–391.

767

768 Rimóczi I. 1992. A Tarnavölgyi erdők nagygombái. *Folia Historico Naturalis Musei Matraensis* **17**:  
769 131–138.

770

- 771 Rimóczi I. 1994. Nagygombáink cönológiai és ökológiai jellemzése. *Mikológiai Közlemények*  
772 *Clusiana* **33**: 3–180.
- 773
- 774 Rosenberg NJ, Blad SB, Verma SB. 1983. *Microclimate: the biological environment*. Wiley, New  
775 York.
- 776
- 777 Rousk J, Bååth E, Brookes PC, Lauber CL, Lozupone C, Caporaso JG, Knight R, Fierer N. 2010.  
778 Soil bacterial and fungal communities across a pH gradient in an arable soil. *The ISME Journal* **4**:  
779 1340–1351.
- 780
- 781 Rudolf K, Pál-Fám F, Morschhauser T. 2008. A Cserehát nagygombái. *Mikológiai Közlemények*  
782 *Clusiana* **47**: 45–74.
- 783
- 784 Semenova TA, Morgado LN, Welker JM, Walker MD, Smets E, Geml J. 2015. Long-term  
785 experimental warming alters community composition of ascomycetes in Alaskan moist and dry arctic  
786 tundra. *Molecular Ecology* **24**: 424–437.
- 787
- 788 Semenova TA, Morgado LN, Welker JM, Walker MD, Smets E, Geml J. 2016. Compositional and  
789 functional shifts in arctic fungal communities in response to experimentally increased snow depth.  
790 *Soil Biology and Biochemistry* **100**: 201–209.
- 791
- 792 Siller I. 2010. A gombák világa. In: Baráz Cs. (Ed.) *A Mátrai Tájvédelmi Körzet – Heves és Nógrád*  
793 *határán*. Bükki Nemzeti Park Igazgatóság, pp. 175–180.
- 794
- 795 Siller I, Dima B. 2014. Adatok a Heves-Borsodi-dombság és az Upponyi-hegység nagygombáihoz.  
796 In: Diczházi I., Schmotzer A. (Eds.) *Apoka – A Heves-Borsodi-dombság és az Upponyi-hegység*  
797 *élővilága*. Bükki Nemzeti Park Igazgatóság, pp. 35–54.
- 798
- 799 Siller I, Dima B, Albert L, Vasas G, Fodor L, Pál-Fám F, Bratek Z, Zagyva I. 2006. Védett  
800 nagygombafajok Magyarországon. *Mikológiai Közlemények Clusiana* **45**: 3–158.
- 801
- 802 Siller I, Turcsányi G, Maglóczky Zs, Czájlik P. 2002. Lignicolous macrofungi of the Kékes North  
803 forest reserve in the Mátra Mountains, Hungary. *Acta Microbiologica et Immunologica Hungarica*  
804 **49**: 193–205.



805

806 Siller I, Vasas G, Pál-Fám F, Bratek Z, Zagyva I, Fodor L. 2002. Hungarian distribution of the  
807 legally protected macrofungi species. *Studia Botanica Hungarica* **36**: 131–163.

808

809 Smith TW, Lundholm JT. 2010. Variation partitioning as a tool to distinguish niche and neutral  
810 processes. *Ecography* **33**: 648–655.

811

812 Sparks DL, Page AL, Helmke PA, Loeppert RH. 1996. *Methods of Soil Analysis Part 3 – Chemical*  
813 *Methods*. Soil Society of America Book Series, American Society of Agronomy, Inc, Madison,  
814 Wisconsin.

815

816 Sternberg M, Shoshany M. 2001. Influence of slope aspect on Mediterranean woody formations:  
817 comparison of a semiarid and an arid site in Isreal. *Ecological Research* **16**: 335–345.

818

819 Suba J. 1983. A Bükk növényei. In: Sándor A. (ed.) *Bükk Nemzeti Park – Kilátás kövekről*.  
820 Mezőgazdasági Kiadó, pp. 189–235.

821

822 Sundseth K. 2009. *Natura 2000 in the Pannonian region*. European Commission, Environment  
823 Directorate General, Brussels.

824 (<http://ec.europa.eu/environment/nature/info/pubs/docs/biogeos/pannonian.pdf>)

825

826 Takács B, Siller I. 1980. A Bükk hegységi Ősbükkös gombái. *Mikológiai Közlemények, Clusiana* **3**:  
827 121–132.

828

829 Tedersoo L, Bahram M, Pölme S, Kõljalg U, Yorou NS, Wijensundera R, Ruiz LV, Vasco-Palacios  
830 AM, Thu QP, Suija A, *et al.* 2014. Global diversity and geography of soil fungi. *Science* **346**:

831 1256688

832

833 Tóth B. 1999. Adatok a Gyepes-völgy (Heves-Borsodi dombág) nagygombáiról. *Kitaibelia* **4**: 261–  
834 270.

835

836 Tóth G. 1983. A bükk karszt vízrendszere. In: Sándor A. (ed.) *Bükk Nemzeti Park – Kilátás*  
837 *kövekről*. Mezőgazdasági Kiadó, pp. 107–134.

838

- 839 van der Heijden MGA, Bardgett RD, van Straalen NM. 2008. The unseen majority: soil microbes as  
840 drivers of plant diversity and productivity in terrestrial ecosystems. *Ecology Letters* **11**:296–310.  
841
- 842 Vojtkó A. 2002. A hegység növénytakarója. In: Baráz Cs. (Ed.) *A Bükk Nemzeti Park – Hegyek,*  
843 *erdők, emberek.* Bükk Nemzeti Park Igazgatóság, pp. 237–261.  
844
- 845 Vojtkó A, Sramkó G, Magos G, Harnos K. 2010. Növényvilág. In: Baráz Cs. (Ed.) *A Mátrai*  
846 *Tájvédelmi Körzet – Heves és Nógrád határán.* Bükk Nemzeti Park Igazgatóság, pp. 149–174.  
847
- 848 Walker MD, Walker DA, Auerbach NA. 1994. Plant communities of a tussock tundra landscape in  
849 the Brooks Range Foothills, Alaska. *Journal of Vegetation Science* **5**: 843–866.  
850
- 851 Wheeler KA, Hurdman BF, Pitt JI. 1991. Influence of pH on the growth of some toxigenic species of  
852 *Aspergillus*, *Penicillium* and *Fusarium*. *International Journal of Food Microbiology*, **12**: 141–150.  
853
- 854 White TM, Bruns, T, Lee S, Taylor J. 1990. Amplification and direct sequencing of fungal ribosomal  
855 RNA for phylogenetics. In: Innis MA, Gelfand DH, Sninsky JJ, White TJ (Eds.) *PCR protocols: a*  
856 *guide to methods and applications.* Academic Press, San Diego, CA, pp. 315–321.  
857
- 858 Whittaker RH. 1956. Vegetation of the Great Smoky Mountains. *Ecological Monographs* **26**: 1–80.  
859  
860  
861

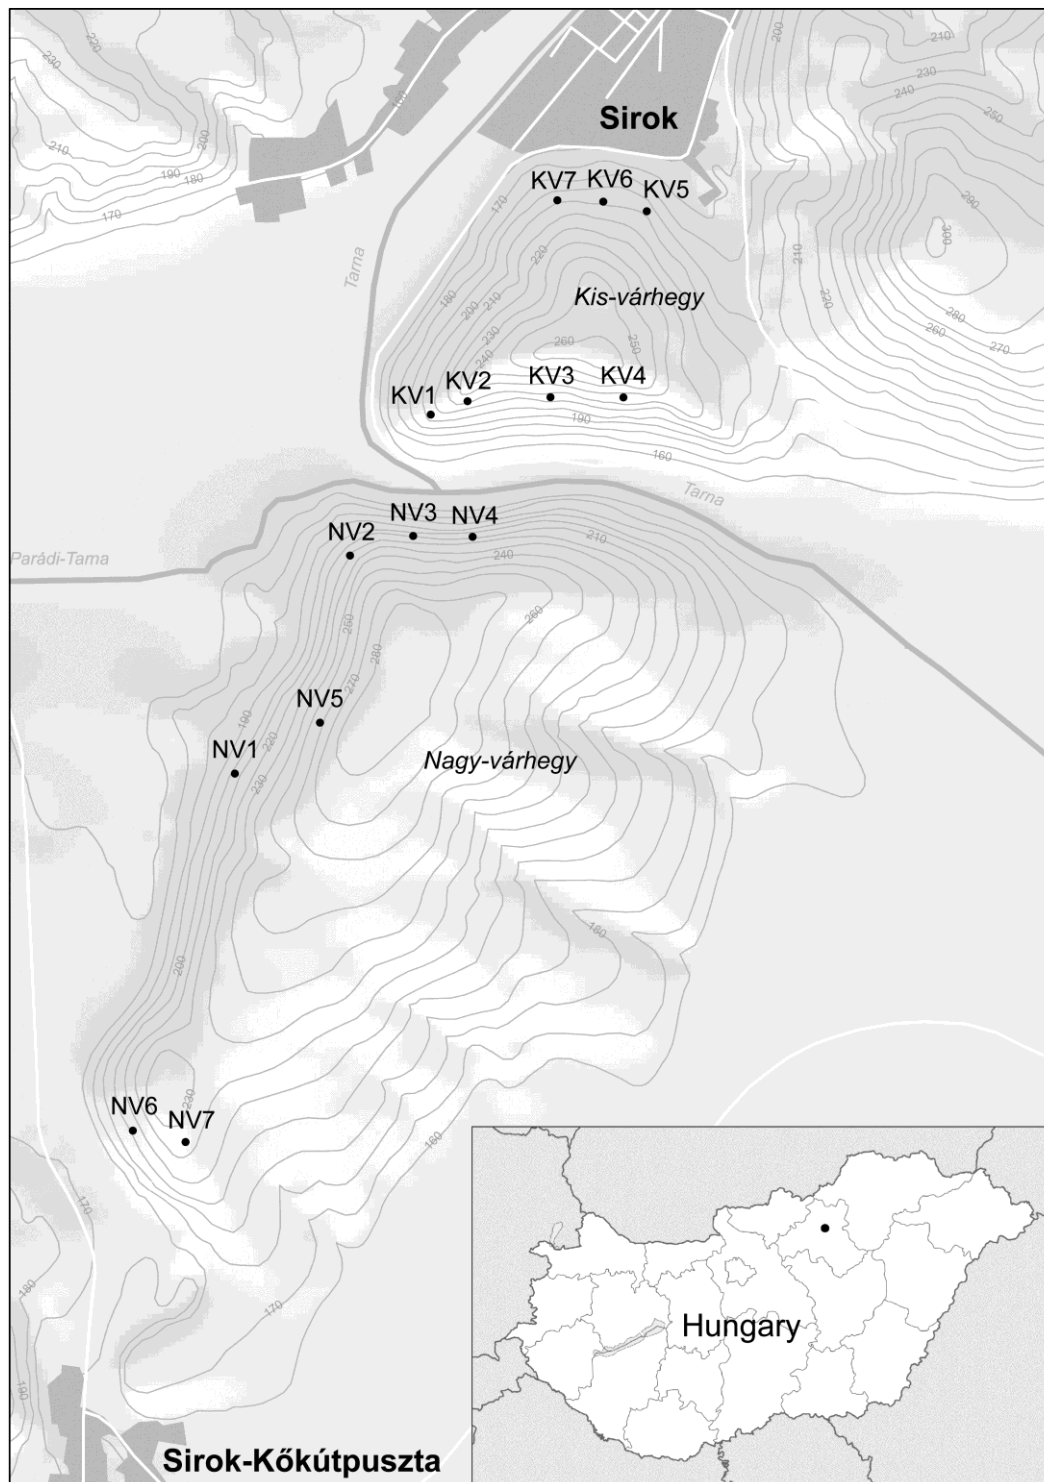

862

863 Fig. 1. A map of the sampling localities, with the location of the region of study in Hungary (inset).

864 Full names, vegetation types, topographic variables, and geographic coordinates corresponding to the

865 sampling localities are listed in Table 1.

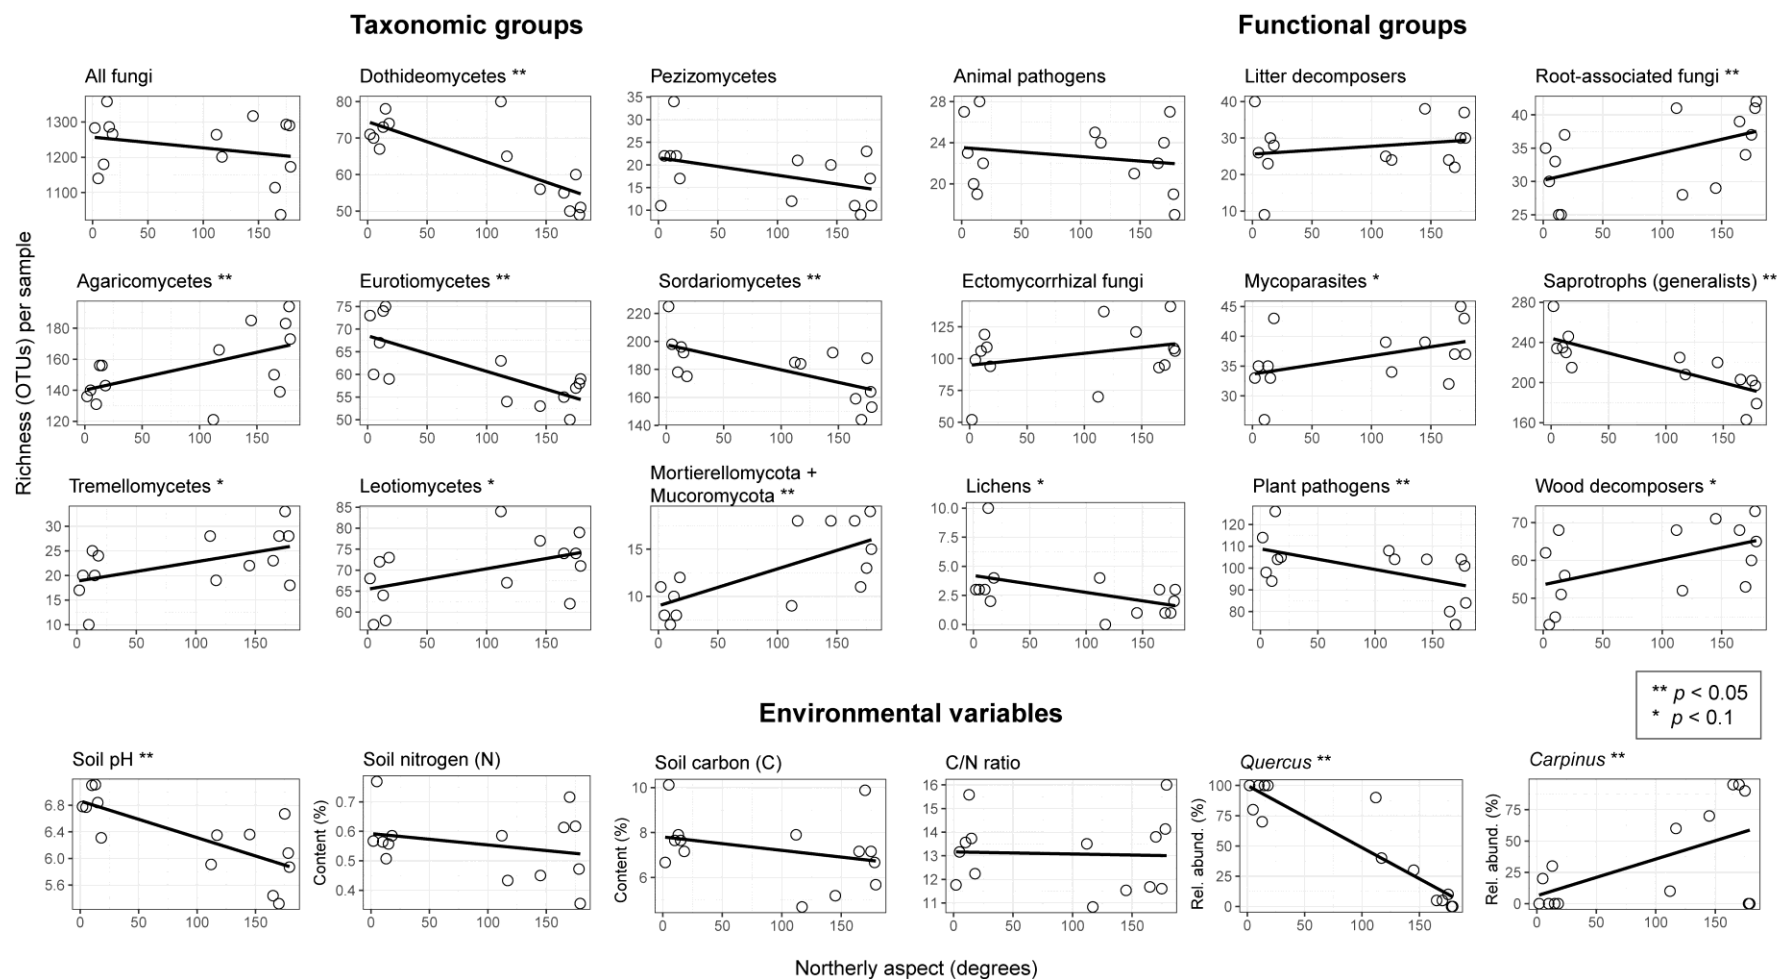

866

867

868 Fig. 2. Correlations between northerly aspect and operational taxonomic unit (OTU) richness of functional and taxonomic groups as well as  
 869 environmental variables explored using linear regression. Significant ( $p < 0.05$ ) and marginally significant ( $p < 0.1$ ) correlations are marked by  
 870 \*\* and \*, respectively.

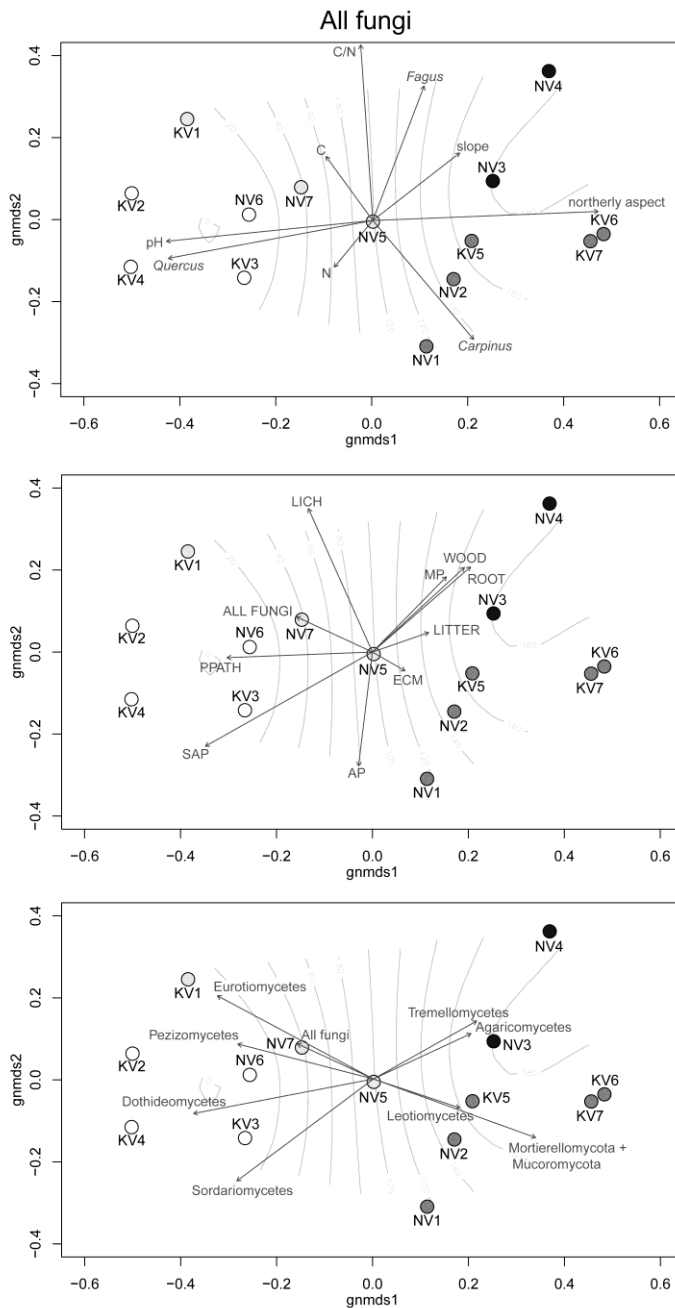

○Downy oak (*Corno-Quercetum pubescentis*) ○Turkey oak-sessile oak (*Quercetum petraeae-cerris*)  
 ●Sessile oak-hornbeam (*Carici pilosae-Carpinetum*) ●Beech (*Melittio-Fagetum*)

871

872

873 Fig. 3. Non-metric multidimensional scaling (NMDS) ordination plots of the fungal communities in  
 874 the sampled forest types based on Hellinger-transformed data, with northerly aspect displayed as  
 875 isolines. Labels, localities and descriptions of the sampling sites are given in Table 1. Vectors of  
 876 environmental variables and richness of functional and taxonomic groups of fungi correlated with  
 877 ordination axes are displayed in three identical ordination plots. Abbreviations for functional guilds:  
 878 AP = animal pathogen, ECM = ectomycorrhizal fungus, MP = mycoparasite, PPATH = plant  
 879 pathogen, ROOT = root-associated (non-ECM) fungus, SAP = generalist saprotroph, WOOD = wood  
 880 decomposer.

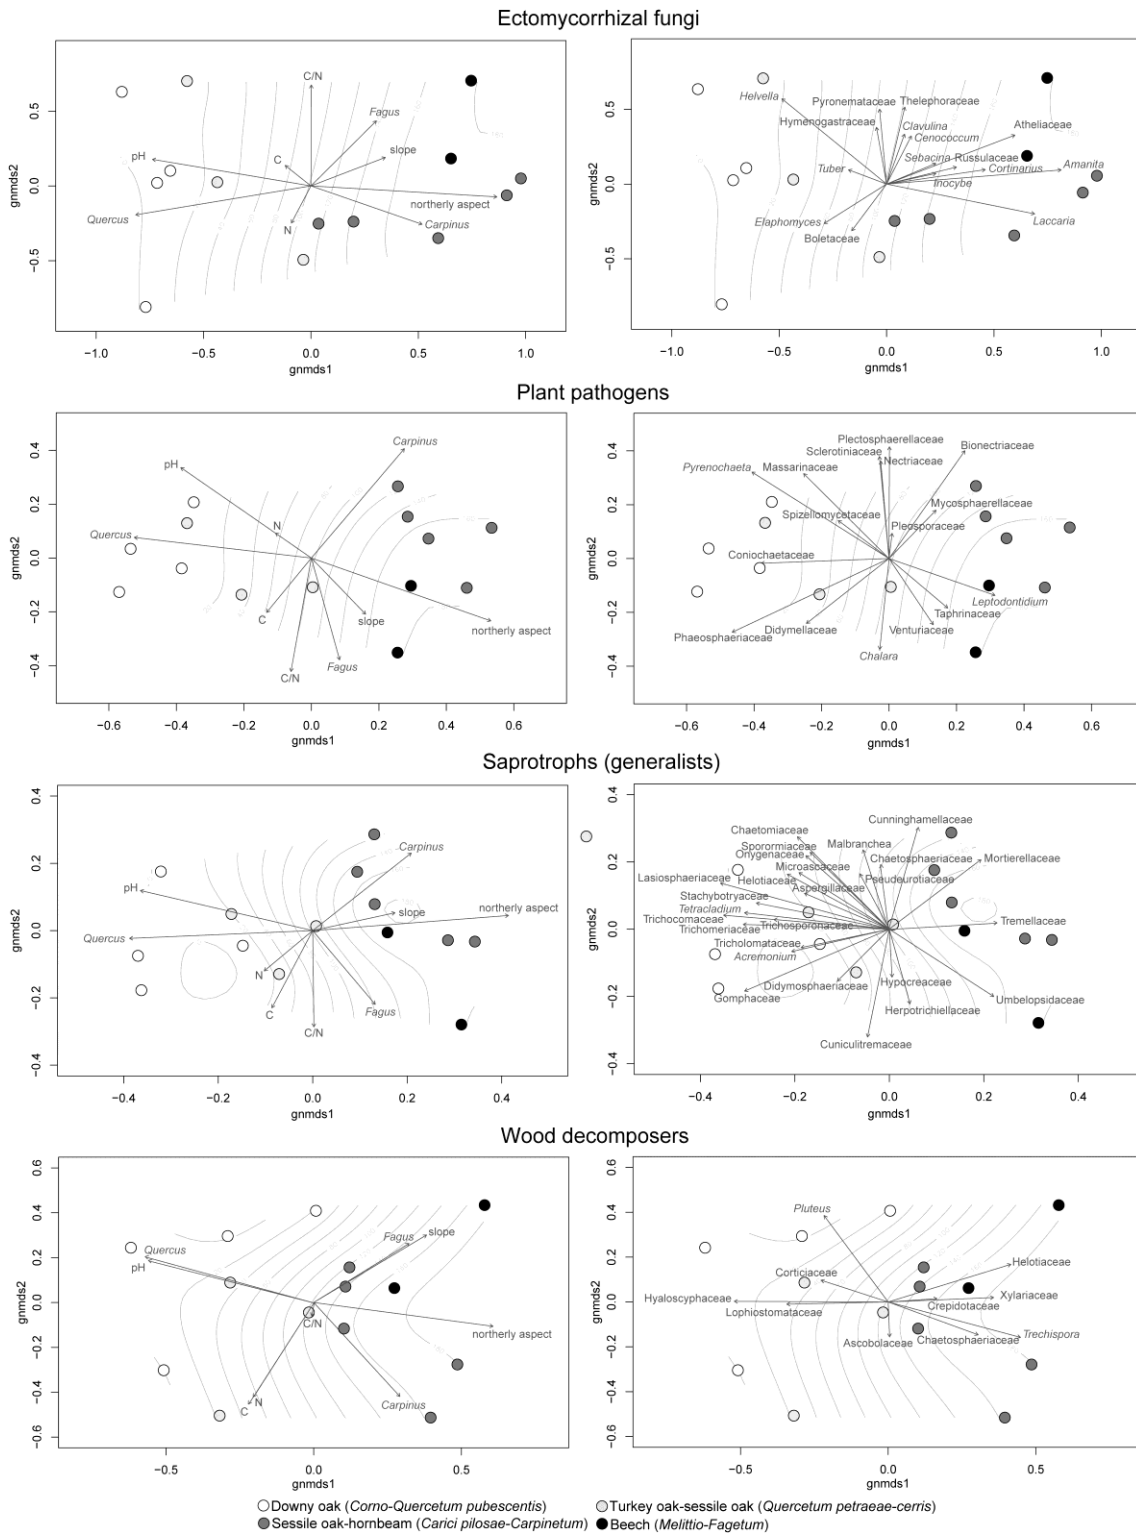

881

882

883 Fig. 4. Non-metric multidimensional scaling (NMDS) ordination plots of the four more diverse  
 884 functional groups of fungi in the sampled forest types based on Hellinger-transformed data, with  
 885 northerly aspect displayed as isolines. Vectors of environmental variables and OTU richness of  
 886 fungal families correlated with ordination axes are displayed. Where a certain family was represented  
 887 by only one genus, the genus name is displayed.

888 Table 1. Sampling sites included in this study with code, locality, forest type, dominant tree species, slope aspect, northerly aspect expressed in  
 889 degrees (south=0, north=180), slope angle, and geographic coordinates. Abbreviations for tree genera are: *C.*: *Carpinus* (Betulaceae), *F.*: *Fagus*  
 890 (*Fagaceae*), and *Q.*: *Quercus* (*Fagaceae*). Locations are displayed in a map in Figure 1.

891

| Site code | Locality     | Forest type                        | Dominant tree species                        | Aspect | Northerly aspect<br>(degrees) | Slope angle<br>(degrees) | Latitude<br>(degrees) | Longitude<br>(degrees) |
|-----------|--------------|------------------------------------|----------------------------------------------|--------|-------------------------------|--------------------------|-----------------------|------------------------|
| KV1       | Kis-várhegy  | <i>Quercetum petraeae-cerris</i>   | <i>Q. dalechampii, Q. petraea, Q. cerris</i> | SW     | 13                            | 22.85                    | 47.918885             | 20.187345              |
| KV2       | Kis-várhegy  | <i>Corno-Quercetum pubescentis</i> | <i>Q. dalechampii, Q. petraea, Q. cerris</i> | S      | 5                             | 5.71                     | 47.918840             | 20.188193              |
| KV3       | Kis-várhegy  | <i>Corno-Quercetum pubescentis</i> | <i>Q. dalechampii, Q. petraea, Q. cerris</i> | S      | 2                             | 29.71                    | 47.919033             | 20.190292              |
| KV4       | Kis-várhegy  | <i>Corno-Quercetum pubescentis</i> | <i>Q. dalechampii, Q. petraea, Q. cerris</i> | S      | 10                            | 24                       | 47.918927             | 20.192524              |
| KV5       | Kis-várhegy  | <i>Carici pilosae-Carpinetum</i>   | <i>C. betulus, Q. petraea</i>                | N      | 175                           | 19.43                    | 47.921958             | 20.193339              |
| KV6       | Kis-várhegy  | <i>Carici pilosae-Carpinetum</i>   | <i>C. betulus, Q. petraea</i>                | N      | 170                           | 22.86                    | 47.921977             | 20.192281              |
| KV7       | Kis-várhegy  | <i>Carici pilosae-Carpinetum</i>   | <i>C. betulus, Q. petraea</i>                | N      | 165                           | 25.14                    | 47.921792             | 20.191034              |
| NV1       | Nagy-várhegy | <i>Carici pilosae-Carpinetum</i>   | <i>C. betulus, Q. petraea</i>                | WNW    | 115                           | 17.14                    | 47.912658             | 20.181935              |
| NV2       | Nagy-várhegy | <i>Carici pilosae-Carpinetum</i>   | <i>C. betulus, Q. petraea</i>                | NW     | 145                           | 33.14                    | 47.916270             | 20.184321              |
| NV3       | Nagy-várhegy | <i>Melittio-Fagetum</i>            | <i>F. sylvatica</i>                          | N      | 178                           | 37.71                    | 47.917315             | 20.186580              |
| NV4       | Nagy-várhegy | <i>Melittio-Fagetum</i>            | <i>F. sylvatica</i>                          | N      | 179                           | 38.85                    | 47.917191             | 20.188443              |
| NV5       | Nagy-várhegy | <i>Quercetum petraeae-cerris</i>   | <i>Q. dalechampii, Q. petraea, Q. cerris</i> | WNW    | 115                           | 22.85                    | 47.913477             | 20.183917              |
| NV6       | Nagy-várhegy | <i>Corno-Quercetum pubescentis</i> | <i>Q. dalechampii, Q. petraea, Q. cerris</i> | SW     | 15                            | 24.28                    | 47.906740             | 20.180339              |
| NV7       | Nagy-várhegy | <i>Quercetum petraeae-cerris</i>   | <i>Q. dalechampii, Q. petraea, Q. cerris</i> | SW     | 18                            | 8                        | 47.906650             | 20.181740              |

892

893

894 Table 2. Fungal OTUs considered as significant indicators of northerly (N) or southerly (S) slope aspects with corresponding  $p$ -values, assigned  
 895 functional guild, matching Species Hypothesis, ITS2 rDNA sequence similarity (%) and taxonomic classification of the most similar matching  
 896 sequence in the UNITE+INSD dynamic Species Hypotheses database (version released on October 10, 2017). Only indicators with a known  
 897 function are shown, displayed in the order of aspect, functional guild, and decreasing significance of indicator value. Abbreviations for  
 898 functional guilds: AP = animal pathogen, ECM = ectomycorrhizal fungus, MP = mycoparasite, PPATH = plant pathogen, ROOT = root-  
 899 associated (non-ECM) fungus, SAP = generalist saprotroph, WOOD = wood decomposer.

900

| OTU      | Aspect | $p$    | Function | Species Hypothesis | %    | Matching taxon                     | Phylum        | Class              |
|----------|--------|--------|----------|--------------------|------|------------------------------------|---------------|--------------------|
| OTU_2513 | S      | 0.0116 | AP       | SH007609.07FU      | 95.5 | <i>Arthroderma insingulare</i>     | Ascomycota    | Eurotiomycetes     |
| OTU_892  | S      | 0.0186 | AP       | SH012485.07FU      | 99.4 | <i>Beauveria</i> sp.               | Ascomycota    | Sordariomycetes    |
| OTU_4940 | S      | 0.0192 | AP       | SH193551.07FU      | 95.6 | <i>Metacordyceps chlamyosporia</i> | Ascomycota    | Sordariomycetes    |
| OTU_423  | S      | 0.0262 | AP       | SH196109.07FU      | 97.5 | <i>Simplicillium minatense</i>     | Ascomycota    | Sordariomycetes    |
| OTU_1990 | S      | 0.0488 | AP       | SH214395.07FU      | 100  | <i>Metarhizium flavoviride</i>     | Ascomycota    | Sordariomycetes    |
| OTU_178  | S      | 0.0036 | ECM      | SH182661.07FU      | 98.8 | <i>Melanogaster ambiguus</i>       | Basidiomycota | Agaricomycetes     |
| OTU_462  | S      | 0.0036 | ECM      | SH182459.07FU      | 99.4 | <i>Scleroderma areolatum</i>       | Basidiomycota | Agaricomycetes     |
| OTU_3    | S      | 0.0046 | ECM      | SH220826.07FU      | 100  | <i>Russula insignis</i>            | Basidiomycota | Agaricomycetes     |
| OTU_674  | S      | 0.0068 | ECM      | SH629220.07FU      | 95.5 | <i>Helvella</i> sp.                | Ascomycota    | Pezizomycetes      |
| OTU_20   | S      | 0.0144 | ECM      | SH214605.07FU      | 96.9 | <i>Sebacina incrustans</i>         | Basidiomycota | Agaricomycetes     |
| OTU_722  | S      | 0.02   | ECM      | SH497502.07FU      | 98.2 | <i>Helvella latispora</i>          | Ascomycota    | Pezizomycetes      |
| OTU_219  | S      | 0.0208 | ECM      | SH222268.07FU      | 99.4 | <i>Membranomyces spurius</i>       | Basidiomycota | Agaricomycetes     |
| OTU_138  | S      | 0.0208 | ECM      | SH006539.07FU      | 100  | <i>Helvella</i> sp.                | Ascomycota    | Pezizomycetes      |
| OTU_112  | S      | 0.0414 | ECM      | SH190455.07FU      | 98.3 | <i>Astraeus telleriae</i>          | Basidiomycota | Agaricomycetes     |
| OTU_2018 | S      | 0.0228 | MP       | SH495246.07FU      | 92.5 | <i>Cosmospora</i> sp.              | Ascomycota    | Sordariomycetes    |
| OTU_501  | S      | 0.0012 | PPATH    | SH443332.07FU      | 96.3 | <i>Fusarium concentricum</i>       | Ascomycota    | Sordariomycetes    |
| OTU_541  | S      | 0.0032 | PPATH    | SH198276.07FU      | 99.4 | Nectriaceae sp.                    | Ascomycota    | Sordariomycetes    |
| OTU_435  | S      | 0.0056 | PPATH    | SH175284.07FU      | 99.4 | <i>Myrothecium</i> sp.             | Ascomycota    | Sordariomycetes    |
| OTU_434  | S      | 0.0062 | PPATH    | SH217882.07FU      | 99.4 | <i>Pyrenochaeta</i> sp.            | Ascomycota    | Dothideomycetes    |
| OTU_279  | S      | 0.0068 | PPATH    | SH202579.07FU      | 96.9 | <i>Pyrenochaeta</i> sp.            | Ascomycota    | Dothideomycetes    |
| OTU_1610 | S      | 0.0096 | PPATH    | SH177600.07FU      | 100  | <i>Microbotryum anomalum</i>       | Basidiomycota | Microbotryomycetes |



|          |   |        |       |               |      |                                       |                 |                 |
|----------|---|--------|-------|---------------|------|---------------------------------------|-----------------|-----------------|
| OTU_1629 | S | 0.0108 | PPATH | SH213880.07FU | 99.4 | <i>Gibberella tricineta</i>           | Ascomycota      | Sordariomycetes |
| OTU_4998 | S | 0.0112 | PPATH | SH345969.07FU | 97.5 | <i>Stagonosporopsis dorenboschii</i>  | Ascomycota      | Dothideomycetes |
| OTU_1425 | S | 0.0154 | PPATH | SH196352.07FU | 100  | <i>Spizellomyces pseudodichotomus</i> | Chytridiomycota | Spizellomycetes |
| OTU_2945 | S | 0.0192 | PPATH | SH175285.07FU | 95.7 | <i>Myrothecium inundatum</i>          | Ascomycota      | Sordariomycetes |
| OTU_5594 | S | 0.0194 | PPATH | SH191389.07FU | 97.5 | <i>Coniochaeta ligniaria</i>          | Ascomycota      | Sordariomycetes |
| OTU_525  | S | 0.0224 | PPATH | SH174362.07FU | 100  | <i>Lectera longa</i>                  | Ascomycota      | Sordariomycetes |
| OTU_2810 | S | 0.0246 | PPATH | SH180770.07FU | 100  | <i>Helminthosporium solani</i>        | Ascomycota      | Dothideomycetes |
| OTU_1113 | S | 0.0032 | ROOT  | SH020834.07FU | 96.3 | <i>Phialocephala compacta</i>         | Ascomycota      | Leotiomycetes   |
| OTU_1268 | S | 0.0238 | ROOT  | SH204998.07FU | 94.3 | <i>Acephala</i> sp.                   | Ascomycota      | Leotiomycetes   |
| OTU_890  | S | 0.0246 | ROOT  | SH008258.07FU | 96.6 | <i>Cadophora</i> sp.                  | Ascomycota      | Leotiomycetes   |
| OTU_748  | S | 0.0276 | ROOT  | SH216991.07FU | 95.7 | <i>Oidiodendron pilicola</i>          | Ascomycota      | Leotiomycetes   |
| OTU_185  | S | 0.0012 | SAP   | SH180481.07FU | 98.8 | <i>Knufia tsunedae</i>                | Ascomycota      | Eurotiomycetes  |
| OTU_1707 | S | 0.0012 | SAP   | SH176700.07FU | 100  | Hypocreales sp.                       | Ascomycota      | Sordariomycetes |
| OTU_935  | S | 0.0012 | SAP   | SH180772.07FU | 98.1 | <i>Corynespora</i> sp.                | Ascomycota      | Dothideomycetes |
| OTU_3865 | S | 0.003  | SAP   | SH629325.07FU | 94.9 | <i>Chaetomium homopilatum</i>         | Ascomycota      | Sordariomycetes |
| OTU_368  | S | 0.003  | SAP   | SH216342.07FU | 98.1 | <i>Kavinia alboviridis</i>            | Basidiomycota   | Agaricomycetes  |
| OTU_350  | S | 0.0068 | SAP   | SH213544.07FU | 98.8 | Hypocreales sp.                       | Ascomycota      | Sordariomycetes |
| OTU_5475 | S | 0.0076 | SAP   | SH527119.07FU | 98.1 | <i>Cladophialophora</i> sp.           | Ascomycota      | Eurotiomycetes  |
| OTU_367  | S | 0.0114 | SAP   | SH217071.07FU | 100  | <i>Podospora</i> sp.                  | Ascomycota      | Sordariomycetes |
| OTU_388  | S | 0.0118 | SAP   | SH008915.07FU | 98.2 | Hypocreales sp.                       | Ascomycota      | Sordariomycetes |
| OTU_1557 | S | 0.013  | SAP   | SH184177.07FU | 98.3 | <i>Preussia persica</i>               | Ascomycota      | Dothideomycetes |
| OTU_1071 | S | 0.015  | SAP   | SH640120.07FU | 91.3 | <i>Durella macrospora</i>             | Ascomycota      | Leotiomycetes   |
| OTU_682  | S | 0.0154 | SAP   | SH021128.07FU | 99.4 | Hypocreales sp.                       | Ascomycota      | Sordariomycetes |
| OTU_479  | S | 0.0188 | SAP   | SH205999.07FU | 100  | <i>Acrostalagmus luteoalbus</i>       | Ascomycota      | Sordariomycetes |
| OTU_5347 | S | 0.0192 | SAP   | SH527119.07FU | 95.7 | <i>Cladophialophora</i> sp.           | Ascomycota      | Eurotiomycetes  |
| OTU_3468 | S | 0.0196 | SAP   | SH014661.07FU | 96.9 | Hypocreales sp.                       | Ascomycota      | Sordariomycetes |
| OTU_96   | S | 0.0206 | SAP   | SH204873.07FU | 99.4 | <i>Chaetomium nigricolor</i>          | Ascomycota      | Sordariomycetes |
| OTU_1105 | S | 0.0208 | SAP   | SH019302.07FU | 95   | Hypocreales sp.                       | Ascomycota      | Sordariomycetes |
| OTU_409  | S | 0.0216 | SAP   | SH201192.07FU | 100  | <i>Schizothecium carpinicola</i>      | Ascomycota      | Sordariomycetes |
| OTU_2009 | S | 0.022  | SAP   | SH003731.07FU | 98.8 | <i>Articulospora</i> sp.              | Ascomycota      | Leotiomycetes   |
| OTU_3406 | S | 0.022  | SAP   | SH026623.07FU | 100  | <i>Trichoderma delicatulum</i>        | Ascomycota      | Sordariomycetes |
| OTU_1576 | S | 0.0224 | SAP   | SH007110.07FU | 100  | Hypocreales sp.                       | Ascomycota      | Sordariomycetes |

|          |   |        |      |               |      |                                      |               |                 |
|----------|---|--------|------|---------------|------|--------------------------------------|---------------|-----------------|
| OTU_3912 | S | 0.0228 | SAP  | SH194607.07FU | 97.2 | <i>Penicillium christenseniae</i>    | Ascomycota    | Eurotiomycetes  |
| OTU_1178 | S | 0.0228 | SAP  | SH183440.07FU | 99.4 | <i>Plectania melastoma</i>           | Ascomycota    | Pezizomycetes   |
| OTU_1694 | S | 0.023  | SAP  | SH128133.07FU | 95.7 | <i>Microcera larvarum</i>            | Ascomycota    | Sordariomycetes |
| OTU_1502 | S | 0.0246 | SAP  | SH207979.07FU | 96.4 | <i>Acremonium persicinum</i>         | Ascomycota    | Sordariomycetes |
| OTU_1025 | S | 0.0332 | SAP  | SH197542.07FU | 92.5 | <i>Didymosphaeria</i> sp.            | Ascomycota    | Dothideomycetes |
| OTU_1444 | S | 0.0342 | SAP  | SH204465.07FU | 94.4 | Hypocreales sp.                      | Ascomycota    | Sordariomycetes |
| OTU_680  | S | 0.0344 | SAP  | SH175276.07FU | 95.2 | Stachybotryaceae sp.                 | Ascomycota    | Sordariomycetes |
| OTU_878  | S | 0.035  | SAP  | SH029684.07FU | 90.4 | <i>Arachnomycetes gracilis</i>       | Ascomycota    | Eurotiomycetes  |
| OTU_1550 | S | 0.0366 | SAP  | SH030697.07FU | 94.4 | <i>Myrmecridium phragmitis</i>       | Ascomycota    | Sordariomycetes |
| OTU_425  | S | 0.0404 | SAP  | SH213541.07FU | 97.2 | Hypocreales sp.                      | Ascomycota    | Sordariomycetes |
| OTU_165  | S | 0.0428 | SAP  | SH014661.07FU | 98.8 | Hypocreales sp.                      | Ascomycota    | Sordariomycetes |
| OTU_1223 | S | 0.0442 | SAP  | SH194321.07FU | 99.4 | <i>Dictyochaeta simplex</i>          | Ascomycota    | Sordariomycetes |
| OTU_1337 | S | 0.0478 | SAP  | SH184969.07FU | 90.1 | Hypocreales sp.                      | Ascomycota    | Sordariomycetes |
| OTU_1810 | S | 0.0012 | WOOD | SH492473.07FU | 96.3 | <i>Monodictys capensis</i>           | Ascomycota    | Dothideomycetes |
| OTU_1642 | S | 0.0178 | WOOD | SH216764.07FU | 100  | <i>Lophiostoma cynaroidis</i>        | Ascomycota    | Dothideomycetes |
| OTU_1194 | S | 0.039  | WOOD | SH216909.07FU | 95.7 | <i>Arachnopeziza aurata</i>          | Ascomycota    | Leotiomycetes   |
| OTU_108  | N | 0.0012 | AP   | SH184964.07FU | 99.4 | <i>Tolypocladium cylindrosporium</i> | Ascomycota    | Sordariomycetes |
| OTU_895  | N | 0.0118 | AP   | SH192574.07FU | 100  | <i>Pochonia bulbillosa</i>           | Ascomycota    | Sordariomycetes |
| OTU_344  | N | 0.0034 | ECM  | SH642176.07FU | 94.6 | <i>Laccaria</i> sp.                  | Basidiomycota | Agaricomycetes  |
| OTU_6    | N | 0.0052 | ECM  | SH214650.07FU | 98.2 | <i>Sebacina</i> sp.                  | Basidiomycota | Agaricomycetes  |
| OTU_57   | N | 0.0056 | ECM  | SH186707.07FU | 100  | <i>Russula cyanoxantha</i>           | Basidiomycota | Agaricomycetes  |
| OTU_37   | N | 0.0056 | ECM  | SH204757.07FU | 97.5 | <i>Tarzetta</i> sp.                  | Ascomycota    | Pezizomycetes   |
| OTU_1741 | N | 0.0076 | ECM  | SH016378.07FU | 100  | <i>Piloderma</i> sp.                 | Basidiomycota | Agaricomycetes  |
| OTU_60   | N | 0.0154 | ECM  | SH214626.07FU | 99.4 | <i>Sebacina</i> sp.                  | Basidiomycota | Agaricomycetes  |
| OTU_67   | N | 0.0202 | ECM  | SH210482.07FU | 95.4 | <i>Paxillus cuprinus</i>             | Basidiomycota | Agaricomycetes  |
| OTU_182  | N | 0.0212 | ECM  | SH195878.07FU | 100  | <i>Inocybe maculata</i>              | Basidiomycota | Agaricomycetes  |
| OTU_450  | N | 0.0228 | ECM  | SH188589.07FU | 100  | <i>Cortinarius decipiens</i>         | Basidiomycota | Agaricomycetes  |
| OTU_15   | N | 0.0242 | ECM  | SH214721.07FU | 96.8 | <i>Sebacina</i> sp.                  | Basidiomycota | Agaricomycetes  |
| OTU_312  | N | 0.0398 | ECM  | SH220557.07FU | 99.4 | <i>Russula chloroides</i>            | Basidiomycota | Agaricomycetes  |
| OTU_111  | N | 0.041  | ECM  | SH185240.07FU | 100  | <i>Tomentella</i> sp.                | Basidiomycota | Agaricomycetes  |
| OTU_2977 | N | 0.021  | MP   | SH190871.07FU | 96.6 | <i>Trichoderma harzianum</i>         | Ascomycota    | Sordariomycetes |
| OTU_1367 | N | 0.0212 | MP   | SH211287.07FU | 98.8 | Cephalothecaceae sp.                 | Ascomycota    | Sordariomycetes |

|          |   |        |       |               |      |                                       |                   |                    |
|----------|---|--------|-------|---------------|------|---------------------------------------|-------------------|--------------------|
| OTU_570  | N | 0.0368 | MP    | SH628832.07FU | 100  | <i>Tremella</i> sp.                   | Basidiomycota     | Tremellomycetes    |
| OTU_731  | N | 0.0404 | MP    | SH195954.07FU | 100  | <i>Hypomyces perniciosus</i>          | Ascomycota        | Sordariomycetes    |
| OTU_43   | N | 0.0032 | PPATH | SH211202.07FU | 100  | Bionectriaceae sp.                    | Ascomycota        | Sordariomycetes    |
| OTU_841  | N | 0.0052 | PPATH | SH211202.07FU | 96.3 | Bionectriaceae sp.                    | Ascomycota        | Sordariomycetes    |
| OTU_699  | N | 0.0056 | PPATH | SH218629.07FU | 98.8 | <i>Chalara</i> sp.                    | Ascomycota        | Leotiomycetes      |
| OTU_1254 | N | 0.0142 | PPATH | SH194809.07FU | 100  | <i>Gnomonia virginiana</i>            | Ascomycota        | Sordariomycetes    |
| OTU_1572 | N | 0.016  | PPATH | SH213283.07FU | 96.9 | <i>Cladosporium</i> sp.               | Ascomycota        | Dothideomycetes    |
| OTU_3715 | N | 0.018  | PPATH | SH217194.07FU | 98.3 | Nectriaceae sp.                       | Ascomycota        | Sordariomycetes    |
| OTU_2484 | N | 0.0214 | PPATH | SH187445.07FU | 100  | <i>Erysiphe arcuata</i>               | Ascomycota        | Leotiomycetes      |
| OTU_2587 | N | 0.0242 | PPATH | SH211202.07FU | 90.9 | Bionectriaceae sp.                    | Ascomycota        | Sordariomycetes    |
| OTU_340  | N | 0.0262 | PPATH | SH209885.07FU | 94.4 | Nectriaceae sp.                       | Ascomycota        | Sordariomycetes    |
| OTU_870  | N | 0.0354 | PPATH | SH116565.07FU | 97.8 | <i>Passalora californica</i>          | Ascomycota        | Dothideomycetes    |
| OTU_5159 | N | 0.0382 | PPATH | SH202969.07FU | 96.9 | <i>Nectria ramulariae</i>             | Ascomycota        | Sordariomycetes    |
| OTU_387  | N | 0.0056 | ROOT  | SH207784.07FU | 99.4 | <i>Meliniomyces</i> sp.               | Ascomycota        | Leotiomycetes      |
| OTU_5186 | N | 0.0056 | ROOT  | SH216990.07FU | 93.8 | <i>Oidiiodendron chlamydosporicum</i> | Ascomycota        | Leotiomycetes      |
| OTU_1785 | N | 0.0096 | ROOT  | SH217001.07FU | 98.2 | <i>Oidiiodendron</i> sp.              | Ascomycota        | Leotiomycetes      |
| OTU_937  | N | 0.0134 | ROOT  | SH217004.07FU | 99.4 | <i>Oidiiodendron echinulatum</i>      | Ascomycota        | Leotiomycetes      |
| OTU_970  | N | 0.0336 | ROOT  | SH181589.07FU | 93.8 | <i>Chloridium</i> sp.                 | Ascomycota        | Sordariomycetes    |
| OTU_489  | N | 0.0104 | SAP   | SH193250.07FU | 98.2 | <i>Cladophialophora</i> sp.           | Ascomycota        | Eurotiomycetes     |
| OTU_1409 | N | 0.0118 | SAP   | SH013614.07FU | 100  | <i>Wardomyces humicola</i>            | Ascomycota        | Sordariomycetes    |
| OTU_780  | N | 0.0128 | SAP   | SH180117.07FU | 99.4 | <i>Mortierella</i> sp.                | Mortierellomycota | Mortierellomycetes |
| OTU_1191 | N | 0.0146 | SAP   | SH019878.07FU | 90.1 | <i>Curreya</i> sp.                    | Ascomycota        | Dothideomycetes    |
| OTU_2865 | N | 0.0192 | SAP   | SH199695.07FU | 99.4 | <i>Absidia cylindrospora</i>          | Mucoromycota      | Mucoromycetes      |
| OTU_1876 | N | 0.0236 | SAP   | SH213264.07FU | 97.5 | <i>Cladophialophora chaetospora</i>   | Ascomycota        | Eurotiomycetes     |
| OTU_332  | N | 0.024  | SAP   | SH196089.07FU | 100  | <i>Umbelopsis dimorpha</i>            | Mucoromycota      | Umbelopsidomycetes |
| OTU_655  | N | 0.0242 | SAP   | SH200349.07FU | 90.8 | <i>Malbranchea dendritica</i>         | Ascomycota        | Eurotiomycetes     |
| OTU_1528 | N | 0.036  | SAP   | SH028610.07FU | 98.8 | <i>Leuconeurospora</i> sp.            | Ascomycota        | Leotiomycetes      |
| OTU_471  | N | 0.048  | SAP   | SH216098.07FU | 99.4 | <i>Umbelopsis changbaiensis</i>       | Mucoromycota      | Umbelopsidomycetes |
| OTU_859  | N | 0.0042 | WOOD  | SH205445.07FU | 100  | <i>Nectriopsis rexiana</i>            | Ascomycota        | Sordariomycetes    |
| OTU_1116 | N | 0.0052 | WOOD  | SH198389.07FU | 97   | <i>Hymenoscyphus fructigenus</i>      | Ascomycota        | Leotiomycetes      |

903 Table 3. Correlation of environmental and spatial variables with each other and with fungal community composition of the sampling sites.  
 904 Correlations among standardized environmental variables and with Hellinger-transformed fungal community matrix were tested individually  
 905 using Mantel tests showing correlation coefficients ( $r$ ) and significance values ( $p$ ). Non-significant results (n.s.) are not shown. In addition, to  
 906 disentangle the ‘pure’ effects of environmental variables on fungal community composition, partial Mantel tests were used in all combinations of  
 907 tested and controlled environmental variables.  
 908

| Correlation among environmental variables |                      |       |                      |                 |
|-------------------------------------------|----------------------|-------|----------------------|-----------------|
|                                           | aspect               | slope | tree genera          | edaphic factors |
| aspect                                    | -                    |       |                      |                 |
| slope                                     | n.s.                 | -     |                      |                 |
| tree genera                               | $r=0.5256; p<0.0001$ | n.s.  | -                    |                 |
| edaphic factors                           | $r=0.1508; p=0.0461$ | n.s.  | $r=0.2661; p=0.0354$ | -               |
| spatial                                   | n.s.                 | n.s.  | n.s.                 | n.s.            |

  

| Correlation with fungal community composition |                      |                                           |                      |                      |                      |                      |
|-----------------------------------------------|----------------------|-------------------------------------------|----------------------|----------------------|----------------------|----------------------|
| Tested variables                              | Mantel test          | Control variables for partial mantel test |                      |                      |                      |                      |
|                                               |                      | aspect                                    | slope                | tree genera          | edaphic factors      | spatial              |
| aspect                                        | $r=0.7429; p<0.0001$ | -                                         | $r=0.7395; p<0.0001$ | $r=0.6368; p<0.0001$ | $r=0.7928; p<0.0001$ | $r=0.7449; p<0.0001$ |
| slope                                         | n.s.                 | n.s.                                      | -                    | n.s.                 | n.s.                 | n.s.                 |
| tree genera                                   | $r=0.5584; p<0.0001$ | $r=0.2949; p=0.0178$                      | $r=0.5486; p=0.0002$ | -                    | $r=0.5108; p=0.0002$ | $r=0.5579; p=0.0001$ |
| edaphic factors                               | $r=0.5347; p<0.0001$ | $r=0.6388; p<0.0001$                      | $r=0.5247; p=0.0002$ | $r=0.4828; p=0.0006$ | -                    | $r=0.5397; p<0.0001$ |
| spatial                                       | n.s.                 | n.s.                                      | n.s.                 | n.s.                 | n.s.                 | -                    |

909

910 **Supporting Information:**

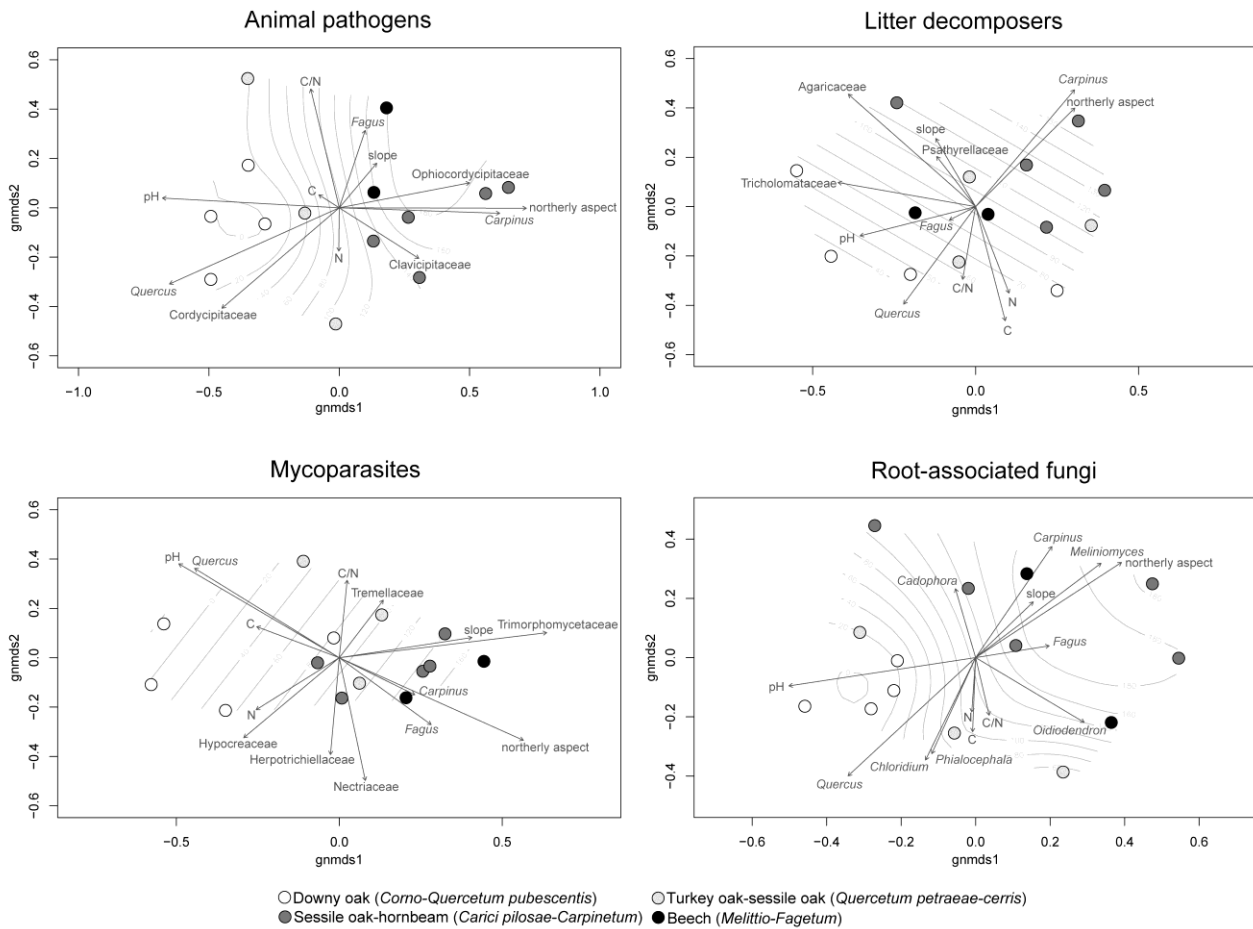

Fig. S1. Non-metric multidimensional scaling (NMDS) ordination plots of animal pathogenic, litter decomposer, mycoparasitic, and root-associated fungi in the sampled forest types based on Hellinger-transformed data. Vectors of environmental variables and OTU richness of fungal families correlated with ordination axes are displayed. Where a certain family was represented by only one genus, the genus name is shown.

911

912

913 Fig. S1. Non-metric multidimensional scaling (NMDS) ordination plots of animal pathogenic, litter  
 914 decomposer, mycoparasitic, and root-associated fungi in the sampled forest types based on  
 915 Hellinger-transformed data. Vectors of environmental variables and OTU richness of fungal families  
 916 correlated with ordination axes are displayed. Where a certain family was represented by only one  
 917 genus, the genus name is shown.

918

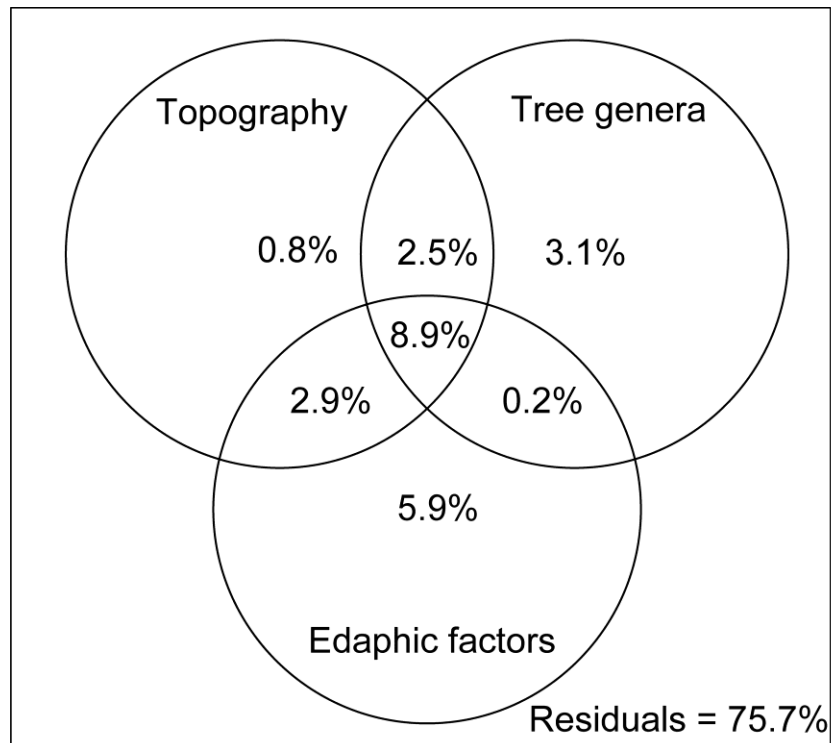

919

920

921 Fig. S2. The contribution of environmental variables to explaining the variation in fungal community  
922 composition among the sampling sites as estimated by variation partitioning analyses. Tested  
923 environmental variables included topography (aspect, slope), relative abundance of tree genera  
924 (*Carpinus*, *Fagus*, *Quercus*), and edaphic factors (soil pH, C, N, and C/N)

925

926

927 Table S1. The full list of taxa corresponding to the 2542 unique SHs that matched the OTUs in the  
928 collected samples with high (> 95%) sequence similarity, with % ITS2 rDNA sequence similarity to  
929 the most similar OTU, Species Hypothesis code, and taxonomic classification. Taxa are ordered  
930 according to phylum, class, order, family, genus, and the identified taxon name (provided upon  
931 manuscript acceptance).
